# Supplementary material for: Comparing shade tolerance measures of woody forest species
Source: PeerJ. 2018 Oct 9;6:e5736. doi: 10.7717/peerj.5736 (PMC6183557; doi:10.7717/peerj.5736)
Supplement: Supplemental Information 6 — Raw data that applied to quantify low-light abundance and sapling ratio of each species. [file peerj-06-5736-s006.csv]

Tag	Species	DBH	Height
12057789	Altingia chinensis	31.35	23
12057786	Altingia chinensis	24.51	23
12057419	Altingia chinensis	13.11	18
12057421	Altingia chinensis	8.09	12
12064735	Altingia chinensis	18.53	25
12057406	Altingia chinensis	23.46	26
12063052	Altingia chinensis	16.68	23
12063046	Altingia chinensis	14.2	16
12063043	Altingia chinensis	18.65	20
12064776	Altingia chinensis	14.64	13
12059479	Altingia chinensis	32.21	25
12058903	Altingia chinensis	3.76	7
12059464	Altingia chinensis	40.11	26
12057433	Altingia chinensis	31.1	25
12052393	Altingia chinensis	14.16	15
12052389	Altingia chinensis	9.84	15
12052388	Altingia chinensis	11.05	16
12025222	Altingia chinensis	3.66	7.5
12052329	Altingia chinensis	23.4	23
12025038	Altingia chinensis	23.24	25
12058080	Altingia chinensis	15.92	20
12064724	Altingia chinensis	28.81	25
12058117	Altingia chinensis	14.64	23
12058124	Altingia chinensis	51.25	28
12058956	Altingia chinensis	28.97	28
12058915	Altingia chinensis	5.98	13
12058875	Altingia chinensis	7.93	16
12025593	Altingia chinensis	40.46	30
12057410	Altingia chinensis	30.43	28
12052323	Altingia chinensis	21.96	25
12052321	Altingia chinensis	7.67	12
12052391	Altingia chinensis	12.61	17
12058084	Altingia chinensis	25.15	22
12068922	Altingia chinensis	4.14	7.5
12068898	Altingia chinensis	47.75	28
12039732	Altingia chinensis	50.29	28
12068968	Altingia chinensis	19.74	15
12058927	Altingia chinensis	5.47	11
12057414	Altingia chinensis	24.99	22
12068655	Altingia chinensis	33.9	20
12058874	Altingia chinensis	9.61	18
12052324	Altingia chinensis	32.15	28
12058306	Altingia chinensis	24.1	26
12052381	Altingia chinensis	33.58	23
12055168	Altingia chinensis	31.19	25
12058622	Altingia chinensis	9.23	15
12058620	Altingia chinensis	22.6	28
12058864	Altingia chinensis	17	20
12052376	Altingia chinensis	30.24	25
12020455	Altingia chinensis	26.04	28
12020164	Altingia chinensis	30.24	26
12052363	Altingia chinensis	2.71	6
12055144	Altingia chinensis	21.01	18
12053130	Altingia chinensis	17.09	23
12053188	Altingia chinensis	1.75	3
12063608	Altingia chinensis	43.61	28
12032360	Altingia chinensis	14.77	18
12033264	Altingia chinensis	39.02	25
12064725	Altingia chinensis	29.89	26
12386414	Altingia chinensis	1.2	2.2
12025306	Altingia chinensis	27.47	26
12064695	Altingia chinensis	39.28	24
12072299	Altingia chinensis	48.22	25
12052394	Altingia chinensis	10.82	15
12057568	Altingia chinensis	25.21	23
12057581	Altingia chinensis	19.16	23
12052397	Altingia chinensis	21.65	25
12068914	Altingia chinensis	6.62	12
12037146	Altingia chinensis	23.59	18
12052392	Altingia chinensis	5.76	12
12038149	Altingia chinensis	18.94	19
12038167	Altingia chinensis	36.45	28
12038183	Altingia chinensis	29.32	26
12072305	Altingia chinensis	5.03	8
12072312	Altingia chinensis	4.2	12
12072309	Altingia chinensis	2.29	3.5
12072318	Altingia chinensis	4.77	10
12057415	Altingia chinensis	27.47	25
12065947	Altingia chinensis	28.68	25
12030092	Altingia chinensis	47.75	30
12068976	Altingia chinensis	13.69	18
12068991	Altingia chinensis	1.56	2.2
12035685	Altingia chinensis	31	28
12035674	Altingia chinensis	7.26	3
12035673	Altingia chinensis	37.27	26
12035616	Altingia chinensis	39.28	28
12038082	Altingia chinensis	22.19	25
12055159	Altingia chinensis	17.19	26
12025282	Altingia chinensis	25.94	25
12052375	Altingia chinensis	12.64	22
12052339	Altingia chinensis	10.12	17
12065812	Altingia chinensis	40.43	28
12063664	Altingia chinensis	22.89	23
12063673	Altingia chinensis	1.43	2.3
12063766	Altingia chinensis	21.96	18
12063778	Altingia chinensis	12.16	16
12021078	Altingia chinensis	41.38	25
12026747	Altingia chinensis	34.22	25
12076460	Altingia chinensis	23.55	25
12077528	Altingia chinensis	24.67	25
12077544	Altingia chinensis	44.02	23
12077543	Altingia chinensis	13.34	15
12077474	Altingia chinensis	31.45	23
12059568	Altingia chinensis	17.19	20
12059566	Altingia chinensis	21.45	15
12052396	Altingia chinensis	11.84	20
12069634	Altingia chinensis	24.61	16
12069629	Altingia chinensis	26.9	18
12058010	Altingia chinensis	35.65	30
12058009	Altingia chinensis	4.77	13
12058066	Altingia chinensis	13.85	16
12058063	Altingia chinensis	10.82	18
12025231	Altingia chinensis	34.98	26
12058992	Altingia chinensis	4.62	12
12065843	Altingia chinensis	19.96	26
12065904	Altingia chinensis	26.32	22
12052386	Altingia chinensis	8.44	18
12065940	Altingia chinensis	11.01	18
12052383	Altingia chinensis	11.55	17
12058673	Altingia chinensis	20.21	26
12055146	Altingia chinensis	6.05	11
12061151	Altingia chinensis	2.01	2.5
12060150	Altingia chinensis	73.21	25
12064374	Altingia chinensis	11.14	11
12064382	Altingia chinensis	1.27	2.8
12058616	Altingia chinensis	5.89	13
12055136	Altingia chinensis	1.91	6
12052367	Altingia chinensis	14.9	17
12052374	Altingia chinensis	22.85	26
12020024	Altingia chinensis	20.63	26
12058855	Altingia chinensis	17.76	20
12058109	Altingia chinensis	19.42	22
12058309	Altingia chinensis	17.28	25
12058364	Altingia chinensis	58.73	28
12067895	Altingia chinensis	4.46	5
12068721	Altingia chinensis	14.9	20
12068707	Altingia chinensis	4.07	9
12068694	Altingia chinensis	22.25	25
12068680	Altingia chinensis	23.08	20
12035514	Altingia chinensis	6.78	15
12035507	Altingia chinensis	15.44	17
12022404	Altingia chinensis	43.48	28
12026419	Altingia chinensis	23.43	25
12060227	Altingia chinensis	18.24	22
12064693	Altingia chinensis	30.43	24
12063031	Altingia chinensis	27.69	25
12064691	Altingia chinensis	41.41	26
12058260	Altingia chinensis	37.5	26
12068973	Altingia chinensis	3.57	4
12058312	Altingia chinensis	14.13	25
12058325	Altingia chinensis	61.34	25
12064407	Altingia chinensis	1.24	2
12032529	Altingia chinensis	26.26	25
12032277	Altingia chinensis	6.59	15
12032280	Altingia chinensis	14.07	13
12020167	Altingia chinensis	13.27	20
12065903	Altingia chinensis	16.07	20
12065927	Altingia chinensis	35.59	28
12068602	Altingia chinensis	10.5	16
12069734	Altingia chinensis	13.85	18
12069767	Altingia chinensis	34.22	25
12068624	Altingia chinensis	34.98	28
12026562	Altingia chinensis	34.31	25
12036996	Altingia chinensis	17.73	18
12058763	Altingia chinensis	20.37	23
12056001	Altingia chinensis	2.16	4.5
12056011	Altingia chinensis	17.19	23
12038204	Altingia chinensis	2.45	6
12038208	Altingia chinensis	13.94	15
12058846	Altingia chinensis	15.5	20
12053178	Altingia chinensis	32.69	26
12057454	Altingia chinensis	36.92	20
12064298	Altingia chinensis	20.59	23
12063575	Altingia chinensis	17.06	25
12053080	Altingia chinensis	2.74	4.5
12033229	Altingia chinensis	29.6	28
12033245	Altingia chinensis	23.55	27
12066529	Altingia chinensis	34.38	26
12053075	Altingia chinensis	17.06	20
12053121	Altingia chinensis	11.78	15
12053051	Altingia chinensis	30.75	25
12053048	Altingia chinensis	10.12	15
12063065	Altingia chinensis	29.35	26
12063105	Altingia chinensis	14.67	15
12063077	Altingia chinensis	24.89	26
12072271	Altingia chinensis	2.99	3.5
12072229	Altingia chinensis	17.76	20
12072320	Altingia chinensis	7.8	11
12072325	Altingia chinensis	10.28	15
12072284	Altingia chinensis	33.14	20
12072261	Altingia chinensis	36.13	25
12024059	Altingia chinensis	34.22	28
12024233	Altingia chinensis	20.24	18
12024232	Altingia chinensis	31.93	28
12024215	Altingia chinensis	35.97	30
12061094	Altingia chinensis	28.71	26
12058638	Altingia chinensis	14.96	15
12057423	Altingia chinensis	16.81	17
12061154	Altingia chinensis	31.19	20
12058630	Altingia chinensis	7.35	18
12061180	Altingia chinensis	5.25	8
12061063	Altingia chinensis	40.43	35
12055078	Altingia chinensis	25.46	23
12055049	Altingia chinensis	7.96	18
12055067	Altingia chinensis	27.37	26
12055119	Altingia chinensis	7.8	16
12064384	Altingia chinensis	51.95	25
12064386	Altingia chinensis	4.81	9
12055135	Altingia chinensis	21.8	23
12055128	Altingia chinensis	5.41	13
12055127	Altingia chinensis	13.69	26
12063718	Altingia chinensis	19.48	18
12055194	Altingia chinensis	1.75	4
12055196	Altingia chinensis	1.69	3.5
12062630	Altingia chinensis	15.28	18
12053083	Altingia chinensis	1.66	3.5
12053079	Altingia chinensis	1.75	3.5
12053076	Altingia chinensis	16.87	18
12025302	Altingia chinensis	19.67	15.7
12027871	Altingia chinensis	37.56	28
12025541	Altingia chinensis	8.21	12
12025564	Altingia chinensis	21.71	19
12061875	Altingia chinensis	31.99	22
12061867	Altingia chinensis	30.72	25
12061866	Altingia chinensis	29.19	25
12063080	Altingia chinensis	8.82	12
12059580	Altingia chinensis	20.69	26
12058028	Altingia chinensis	25.94	25
12063090	Altingia chinensis	22.92	25
12063086	Altingia chinensis	18.49	22
12063116	Altingia chinensis	17.7	23
12063120	Altingia chinensis	16.39	23
12063136	Altingia chinensis	24.38	25
12052291	Altingia chinensis	34.76	30
12063126	Altingia chinensis	19.48	23
12063190	Altingia chinensis	22.73	23
12069790	Altingia chinensis	23.24	28
12069728	Altingia chinensis	10.19	18
12068601	Altingia chinensis	21.71	18
12020182	Altingia chinensis	27.85	30
12055094	Altingia chinensis	21.01	25
12055087	Altingia chinensis	1.18	1.8
12072332	Altingia chinensis	1.59	3.8
12072355	Altingia chinensis	2.86	5
12072329	Altingia chinensis	29.86	25
12072326	Altingia chinensis	2.55	6
12058815	Altingia chinensis	31.16	25
12053149	Altingia chinensis	19.61	20
12056014	Altingia chinensis	24.99	27
12054283	Altingia chinensis	25.56	25
12054288	Altingia chinensis	3.5	5
12020108	Altingia chinensis	33.01	28
12020021	Altingia chinensis	28.43	30
12054275	Altingia chinensis	50.07	28
12063414	Altingia chinensis	3.18	7
12062711	Altingia chinensis	68.44	28
12062752	Altingia chinensis	43.7	28
12057583	Altingia chinensis	40.58	30
12027900	Altingia chinensis	10.15	14
12020518	Altingia chinensis	18.43	25
12020522	Altingia chinensis	42.11	25
12020524	Altingia chinensis	10.06	15
12063183	Altingia chinensis	53.38	25
12032333	Altingia chinensis	2.32	4
12020495	Altingia chinensis	41.92	30
12060235	Altingia chinensis	25.15	25
12060248	Altingia chinensis	2.01	2
12058254	Altingia chinensis	7.45	8
12061474	Altingia chinensis	35.01	25
12058249	Altingia chinensis	33.52	27
12064608	Altingia chinensis	12.67	18
12027992	Altingia chinensis	35.59	28
12063085	Altingia chinensis	22.38	19
12079586	Altingia chinensis	26.96	28
12060331	Altingia chinensis	12.89	18
12058840	Altingia chinensis	3.37	6
12053143	Altingia chinensis	3.66	4.5
12064225	Altingia chinensis	17	23
12020179	Altingia chinensis	27.79	25
12058641	Altingia chinensis	31.83	25
12061156	Altingia chinensis	1.24	1.8
12072333	Altingia chinensis	2.29	4
12058643	Altingia chinensis	28.65	26
12050217	Altingia chinensis	6.14	7
12027906	Altingia chinensis	18.46	19
12063175	Altingia chinensis	20.79	18
12070840	Altingia chinensis	25.81	24
12070834	Altingia chinensis	70.03	30
12025575	Altingia chinensis	4.3	6
12060356	Altingia chinensis	12.8	18
12057197	Altingia chinensis	15.44	18
12064290	Altingia chinensis	5.63	10
12058851	Altingia chinensis	16.74	25
12057722	Altingia chinensis	4.14	8
12064759	Altingia chinensis	16.27	15
12061468	Altingia chinensis	38.32	28
12059591	Altingia chinensis	6.68	15
12050218	Altingia chinensis	2.67	4
12061859	Altingia chinensis	23.59	26
12072334	Altingia chinensis	6.11	12
12063552	Altingia chinensis	20.28	18
12061858	Altingia chinensis	1.37	2
12061166	Altingia chinensis	5.73	13
12072391	Altingia chinensis	2.86	5
12064297	Altingia chinensis	22.76	23
12060375	Altingia chinensis	10.09	14
12063449	Altingia chinensis	17.54	23
12061198	Altingia chinensis	2.01	4.5
12061131	Altingia chinensis	41.86	38
12055193	Altingia chinensis	1.91	4
12022483	Altingia chinensis	2.45	4
12064265	Altingia chinensis	18.24	22
12077720	Glochidion wrightii	2.23	3
12075749	Glochidion wrightii	1.5	2.5
12074245	Glochidion wrightii	1.31	1.8
12055231	Glochidion wrightii	1.37	2.8
12037125	Artocarpus hypargyreus	1.43	3
12076569	Artocarpus hypargyreus	10.6	12
12066435	Artocarpus hypargyreus	7.48	7
12024388	Tarenna mollissima	1.59	2.2
12386765	Tarenna mollissima	1.05	2.2
12037767	Tarenna mollissima	1.18	2.5
12076780	Tarenna mollissima	1.15	2.5
12072049	Tarenna mollissima	2.77	4
12072051	Tarenna mollissima	1.59	3
12070756	Tarenna mollissima	1.43	2.5
12072061	Tarenna mollissima	2.51	4
12037140	Tarenna mollissima	1.34	2.3
12058159	Tarenna mollissima	1.11	2
12036319	Tarenna mollissima	1.43	2.5
12030382	Tarenna mollissima	1.59	3
12030035	Tarenna mollissima	1.85	2.5
12025607	Tarenna mollissima	1.43	2.8
12058220	Tarenna mollissima	1	2.5
12078170	Tarenna mollissima	1.4	2
12076777	Tarenna mollissima	1.11	3
12076790	Tarenna mollissima	1.18	2.5
12071888	Symplocos anomala	1.46	2.5
12053155	Symplocos anomala	1.31	2.3
12387054	Symplocos anomala	1.55	2.6
12099317	Symplocos anomala	2.9	7
12025296	Symplocos anomala	1.66	3.8
12070276	Symplocos anomala	2.99	4.5
12068899	Symplocos anomala	1.53	3
12065834	Symplocos anomala	2.8	7
12071978	Symplocos anomala	1.72	2.5
12077408	Symplocos anomala	3.63	7.5
12032494	Symplocos anomala	1.69	3.5
12079978	Symplocos anomala	8.37	9
12038383	Symplocos anomala	3.02	5.5
12058682	Symplocos anomala	3.18	7.5
12033142	Symplocos anomala	1.05	2
12032083	Symplocos anomala	3.09	5
12025563	Symplocos anomala	1.85	6
12078948	Symplocos anomala	3.34	6
12066767	Symplocos anomala	1.08	2.3
12004720	Symplocos anomala	2.36	5
12030342	Symplocos anomala	1.27	3
12078431	Symplocos anomala	3.41	9
12038442	Symplocos anomala	1.34	3
12056157	Symplocos anomala	1.31	3
12037009	Symplocos anomala	1.75	3.8
12079969	Symplocos anomala	3.53	6
12072991	Symplocos anomala	2.32	5.5
12070300	Symplocos anomala	1.59	3.5
12077719	Symplocos anomala	1.53	5.5
12027190	Symplocos anomala	1.78	3.5
12079387	Symplocos anomala	2.16	4
12056204	Symplocos anomala	1.53	3
12056242	Symplocos anomala	2.07	3
12061084	Symplocos anomala	5.73	13
12031024	Symplocos anomala	1.91	4.5
12077948	Symplocos anomala	2.32	4.5
12022416	Symplocos anomala	2.13	4.5
12065438	Symplocos anomala	1.4	2.8
12071860	Symplocos anomala	2.01	4.5
12030343	Symplocos anomala	1.59	3.5
12031320	Symplocos anomala	1.72	3
12057542	Symplocos anomala	2.93	6
12074256	Symplocos anomala	2.61	3
12056059	Symplocos anomala	2.51	6
12077283	Symplocos anomala	1.08	2.6
12020312	Symplocos anomala	4.84	9
12020327	Symplocos anomala	3.21	6.5
12079603	Symplocos anomala	2.67	6.5
12059325	Ficus variolosa	7.48	13
12061586	Ficus variolosa	8.31	14
12021050	Ficus variolosa	7.19	8
12032442	Ficus variolosa	8.12	8
120728931	Ficus variolosa	2.23	4.5
12039096	Ficus variolosa	8.12	8
12025634	Ficus variolosa	7.67	12
12029776	Ficus variolosa	6.14	7
12079270	Ficus variolosa	1.53	2.5
12025709	Ficus variolosa	12.83	10
12022562	Ficus variolosa	8.18	7
12061457	Ficus variolosa	4.07	5
12032291	Ficus variolosa	7.54	12
12039471	Ficus variolosa	5.09	12
12078088	Ficus variolosa	12.99	9
12060833	Ficus variolosa	2.39	4.5
12072876	Ficus variolosa	7.1	6
12061976	Ficus variolosa	6.68	8
12020480	Ficus variolosa	8.59	15
12077551	Ficus variolosa	2.07	3.8
12022959	Ficus variolosa	7.45	7
12078145	Ficus variolosa	1.59	3
12061908	Ficus variolosa	2.71	3.5
12058753	Ficus variolosa	7	12
12022957	Ficus variolosa	2.07	5
12025979	Ficus variolosa	10.38	12
12026573	Ficus variolosa	3.92	7.5
12021713	Ficus variolosa	7.96	13
12026533	Ficus variolosa	10.44	16
12076434	Ficus variolosa	3.18	6
12025509	Ficus variolosa	4.9	7.5
12021051	Ficus variolosa	6.53	7
12039771	Ficus variolosa	7.58	12
12055023	Camellia sinensis	1.59	3.5
12020112	Camellia sinensis	2.32	3
12020110	Camellia sinensis	2.42	5
12054256	Camellia sinensis	3.69	7
12060816	Camellia sinensis	2.39	4.5
12055021	Camellia sinensis	1.31	3
12052332	Camellia sinensis	1.18	2
12058046	Camellia sinensis	1.11	2.5
12060214	Camellia sinensis	2.64	4.5
12029800	Camellia sinensis	2.29	3
12077341	Camellia sinensis	1.43	2.5
12063074	Camellia sinensis	1.53	2.8
12060503	Camellia sinensis	2.07	3
12055126	Camellia sinensis	3.37	7
12064418	Camellia sinensis	1.05	1.7
12060056	Camellia sinensis	4.3	6
12054369	Camellia sinensis	1.78	2.9
12063182	Camellia sinensis	1.34	2.5
12054163	Camellia sinensis	2.48	3
12058689	Camellia sinensis	4.14	6
12037076	Litsea rotundifolia var. oblongifolia	10.82	15
12069620	Litsea rotundifolia var. oblongifolia	7	11
12024228	Litsea rotundifolia var. oblongifolia	1.43	3.5
12078006	Litsea rotundifolia var. oblongifolia	1.31	2.5
12064737	Litsea rotundifolia var. oblongifolia	9.36	20
12038214	Litsea rotundifolia var. oblongifolia	18.65	18
12071961	Litsea rotundifolia var. oblongifolia	4.39	7
12039716	Litsea rotundifolia var. oblongifolia	1.53	3
12062028	Litsea rotundifolia var. oblongifolia	1.66	3
12064656	Litsea rotundifolia var. oblongifolia	17.41	16
12064758	Litsea rotundifolia var. oblongifolia	2.39	6
12062734	Litsea rotundifolia var. oblongifolia	1.69	2
12099255	Litsea rotundifolia var. oblongifolia	2.07	4.5
12037194	Litsea rotundifolia var. oblongifolia	6.68	13
12020570	Litsea rotundifolia var. oblongifolia	15.28	18
12072829	Litsea rotundifolia var. oblongifolia	4.93	5
12033170	Litsea rotundifolia var. oblongifolia	1.11	2.8
12065977	Litsea rotundifolia var. oblongifolia	18.27	11
12063656	Litsea rotundifolia var. oblongifolia	3.76	6
12050334	Litsea rotundifolia var. oblongifolia	7.54	13
12036316	Litsea rotundifolia var. oblongifolia	1.4	2.8
12079279	Litsea rotundifolia var. oblongifolia	3.47	7
12023085	Litsea rotundifolia var. oblongifolia	1.27	2.8
12099256	Litsea rotundifolia var. oblongifolia	2.55	5
12039032	Litsea rotundifolia var. oblongifolia	13.56	15
12031179	Litsea rotundifolia var. oblongifolia	1.4	2.8
12076453	Litsea rotundifolia var. oblongifolia	1.91	4.5
12057749	Litsea rotundifolia var. oblongifolia	5.41	11
12059532	Litsea rotundifolia var. oblongifolia	1.5	3
12072891	Litsea rotundifolia var. oblongifolia	13.02	6
12035419	Litsea rotundifolia var. oblongifolia	8.05	15
12072193	Litsea rotundifolia var. oblongifolia	2.07	3.5
12026578	Litsea rotundifolia var. oblongifolia	1.78	4
12033081	Litsea rotundifolia var. oblongifolia	7.35	16
12057799	Litsea rotundifolia var. oblongifolia	1	1.8
12079604	Litsea rotundifolia var. oblongifolia	1.4	3.5
12099558	Litsea rotundifolia var. oblongifolia	1	2.3
12079814	Litsea rotundifolia var. oblongifolia	1.69	4
12061893	Litsea rotundifolia var. oblongifolia	1.43	2.8
12386483	Litsea rotundifolia var. oblongifolia	1.2	3.3
12039442	Litsea rotundifolia var. oblongifolia	1.59	2.8
12035773	Litsea rotundifolia var. oblongifolia	1.4	4
12069211	Litsea rotundifolia var. oblongifolia	1.43	3
12029446	Litsea rotundifolia var. oblongifolia	2.23	4.5
12061431	Litsea rotundifolia var. oblongifolia	4.11	7
12057784	Litsea rotundifolia var. oblongifolia	1.91	5
12061852	Litsea rotundifolia var. oblongifolia	11.14	15
12061853	Litsea rotundifolia var. oblongifolia	2.8	4
12024795	Lindera chunii	2.01	5
12071876	Lindera chunii	1.78	3
12024796	Lindera chunii	3.53	5.5
12071975	Lindera chunii	2.29	5
12066403	Lindera chunii	2.04	4
12075695	Lindera chunii	2.45	5
12077237	Lindera chunii	7.96	9
12020022	Lindera chunii	3.37	7
12037678	Lindera chunii	5.89	9
12025089	Lindera chunii	1.18	1.8
12071832	Lindera chunii	3.25	6
12076649	Lindera chunii	3.34	4
12026428	Lindera chunii	2.26	4
12037680	Lindera chunii	1.11	5
12057555	Lindera chunii	3.82	6.5
12039662	Lindera chunii	2.2	4.5
12060209	Lindera chunii	1.56	3
12072431	Lindera chunii	2.2	5
12024789	Lindera chunii	2.86	4
12071811	Lindera chunii	3.02	5
12024345	Lindera chunii	2.07	3.8
12072625	Lindera chunii	1.34	2.8
12071809	Lindera chunii	1.69	3.5
12071934	Lindera chunii	3.92	7
12025519	Lindera chunii	1.11	1.8
12029766	Lindera chunii	4.46	7.5
12022736	Lindera chunii	1.21	2
12024699	Lindera chunii	3.82	5
12023039	Lindera chunii	3.41	7
12031377	Lindera chunii	4.49	7.5
12025520	Lindera chunii	1.62	2.3
12057489	Lindera chunii	1.05	1.7
12078138	Lindera chunii	2.01	2.8
12078130	Lindera chunii	4.23	6
12072228	Lindera chunii	2.13	4
12072217	Lindera chunii	1.75	3.3
12039667	Lindera chunii	4.17	7
12078024	Lindera chunii	5.44	7
12039632	Lindera chunii	1.97	5
12070728	Lindera chunii	1.59	3.5
12070693	Lindera chunii	2.32	6
12070715	Lindera chunii	2.36	3
12070356	Lindera chunii	4.14	8
12070268	Lindera chunii	2.61	7
12070427	Lindera chunii	1.31	3.3
12072215	Lindera chunii	2.2	4.5
12037681	Lindera chunii	16.23	4.5
12078073	Lindera chunii	4.65	7
12096485	Lindera chunii	2.58	4.5
12078056	Lindera chunii	2.74	3.8
12039631	Lindera chunii	2.86	3
12057554	Lindera chunii	1.27	1.8
12072071	Lindera chunii	3.82	5
12072105	Lindera chunii	3.63	5
12070551	Lindera chunii	3.66	8
12057523	Lindera chunii	3.98	7
12024396	Lindera chunii	3.76	7.5
12077634	Lindera chunii	4.01	8.5
12077736	Lindera chunii	8.21	8
12077672	Lindera chunii	3.88	4.5
12037685	Lindera chunii	2.71	3.5
12386845	Lindera chunii	1.1	2.6
12077985	Lindera chunii	3.5	7
12025432	Lindera chunii	2.74	5
10018961	Lindera chunii	1.56	2.2
12078026	Lindera chunii	3.63	5
12029763	Lindera chunii	2.32	5
12071915	Lindera chunii	1.91	2.3
12031355	Lindera chunii	2.61	3
12028145	Lindera chunii	1.62	2.5
12099371	Lindera chunii	1.4	2.5
12032839	Lindera chunii	2.61	6
12032838	Lindera chunii	1.53	2.5
12077708	Lindera chunii	2.9	7
12077908	Lindera chunii	2.29	6
12037672	Lindera chunii	3.37	5
12024343	Lindera chunii	2.1	3
12037676	Lindera chunii	5.41	10
12037605	Lindera chunii	3.5	7.5
12037655	Lindera chunii	3.82	6
12037656	Lindera chunii	3.98	7
12037606	Lindera chunii	2.64	5
12032986	Lindera chunii	4.46	7
12032980	Lindera chunii	1.53	2.6
12032880	Lindera chunii	3.15	7.5
12072458	Lindera chunii	3.5	4.5
12036306	Lindera chunii	3.5	4.5
12077346	Lindera chunii	6.43	7.5
12072531	Lindera chunii	1.43	4
12037669	Lindera chunii	1.59	3.5
12057552	Lindera chunii	2.04	4.5
12020341	Lindera chunii	2.29	4
12035922	Lindera chunii	2.39	3.8
12077881	Lindera chunii	3.37	7
12077641	Lindera chunii	4.23	4.5
12077874	Lindera chunii	2.93	5.5
12077746	Lindera chunii	8.44	13
12070548	Lindera chunii	1.75	3.8
12061436	Lindera chunii	1.08	2.5
12062349	Lindera chunii	4.23	6.5
12062310	Lindera chunii	1.81	3.8
12001142	Lindera chunii	1.02	2.4
12031145	Lindera chunii	3.02	5
12020152	Lindera chunii	2.55	3.5
12021483	Lindera chunii	1.31	2.3
12024306	Lindera chunii	2.86	4
12071917	Lindera chunii	1.75	3
12021797	Lindera chunii	3.12	5.5
12070208	Lindera chunii	3.98	8
12078804	Lindera chunii	5.12	11
12078900	Lindera chunii	4.36	6.5
12037709	Lindera chunii	3.18	6
12078963	Lindera chunii	4.46	6
12078813	Lindera chunii	8.75	10
12078917	Lindera chunii	2.29	4.5
12038145	Lindera chunii	1.88	3.2
12036308	Lindera chunii	4.77	7
12077520	Lindera chunii	1.31	1.7
12070785	Lindera chunii	5.09	7
12070658	Lindera chunii	6.21	7.5
12078679	Lindera chunii	2.01	4
12078680	Lindera chunii	4.49	7
12078686	Lindera chunii	3.82	7
12078689	Lindera chunii	2.86	4.5
12078690	Lindera chunii	1.53	5.5
12078693	Lindera chunii	1	2.5
12070332	Lindera chunii	1.78	3.8
12072459	Lindera chunii	1.59	3.5
12078710	Lindera chunii	1.53	2.3
12078765	Lindera chunii	2.04	3.5
12035909	Lindera chunii	2.1	5
12072069	Lindera chunii	2.99	5
12027835	Lindera chunii	5.03	7
12027867	Lindera chunii	2.32	4
12026433	Lindera chunii	1.69	3.5
12026436	Lindera chunii	2.1	4.2
12024394	Lindera chunii	1.72	4
12031068	Lindera chunii	6.81	5
12031074	Lindera chunii	1.21	2.8
12031077	Lindera chunii	3.37	3.5
12074230	Lindera chunii	2.8	4
12074229	Lindera chunii	2.86	4.5
12074258	Lindera chunii	3.37	7.5
12031173	Lindera chunii	2.96	6
12031194	Lindera chunii	1.43	2.8
12026325	Lindera chunii	1.81	3
12026327	Lindera chunii	1.34	2.5
12078039	Lindera chunii	1.53	3
12078025	Lindera chunii	4.9	7
12074232	Lindera chunii	2.01	2.8
12099565	Lindera chunii	2.45	4
12037784	Lindera chunii	4.74	7
12037790	Lindera chunii	5.89	7.5
12070881	Lindera chunii	5.35	7.5
12072212	Lindera chunii	1.59	3.5
12024205	Lindera chunii	1.56	2.6
12078412	Lindera chunii	1.97	3.3
12078407	Lindera chunii	3.66	3.8
12026492	Lindera chunii	2.39	2.5
11020767	Lindera chunii	1.24	2.2
12079915	Lindera chunii	4.36	5.5
12079866	Lindera chunii	3.44	7
12079850	Lindera chunii	4.81	5
12079836	Lindera chunii	4.9	7
12032112	Lindera chunii	3.82	5
12004789	Lindera chunii	3.5	5
12078699	Lindera chunii	1.18	2.8
12078704	Lindera chunii	1.11	3
12032189	Lindera chunii	5.25	6
12386334	Lindera chunii	1.6	4.5
12004734	Lindera chunii	6.14	7
12035921	Lindera chunii	3.44	6.5
12070507	Lindera chunii	2.71	6
12070494	Lindera chunii	6.62	9
12001091	Lindera chunii	3.25	5
12057522	Lindera chunii	2.58	5
12031052	Lindera chunii	1.62	3
12037686	Lindera chunii	3.92	7
12076742	Lindera chunii	2.8	4
12076650	Lindera chunii	1.53	3.8
12037707	Lindera chunii	1.75	4
12037712	Lindera chunii	2.23	3
12078897	Lindera chunii	6.05	7.5
12074300	Lindera chunii	2.07	5
12074329	Lindera chunii	4.68	4.5
12074328	Lindera chunii	2.74	5
12024794	Lindera chunii	1.69	3
12074240	Lindera chunii	2.39	6
12074239	Lindera chunii	6.68	9
12077760	Lindera chunii	2.96	5
12025485	Lindera chunii	1.11	2.3
12037714	Lindera chunii	1.05	7
12037706	Lindera chunii	2.51	4
12004788	Lindera chunii	4.52	7.5
12004783	Lindera chunii	2.71	6
12070461	Lindera chunii	4.97	7
12036307	Lindera chunii	7.32	10
12076597	Lindera chunii	2.39	3.8
12036329	Lindera chunii	1.43	2
12077480	Lindera chunii	1.75	3.5
12070920	Lindera chunii	2.86	6
12025209	Lindera chunii	5.16	7.5
12025294	Lindera chunii	2.29	3
12074228	Lindera chunii	3.82	5
12021798	Lindera chunii	2.01	4
12070373	Lindera chunii	3.88	7
12037705	Lindera chunii	2.16	3.8
12070376	Lindera chunii	1.5	3.5
12037618	Lindera chunii	3.92	6
12020294	Lindera chunii	1.43	2.1
12035915	Lindera chunii	3.72	6
12386768	Lindera chunii	1	2
12021534	Lindera chunii	3.88	3.8
12079273	Lindera chunii	1.18	2.5
12070320	Lindera chunii	1.53	3
12032971	Lindera chunii	1.91	3
12069037	Lindera chunii	1.37	2.5
12037623	Lindera chunii	3.82	7
12032056	Lindera chunii	3.82	5
12072581	Lindera chunii	2.77	5.5
12022528	Lindera chunii	3.57	5
12079738	Lindera chunii	3.34	5
12074310	Lindera chunii	1.08	2.5
12079278	Lindera chunii	3.37	6
12004735	Lindera chunii	7.48	8
12036305	Lindera chunii	5.51	4
12037620	Lindera chunii	2.86	4
12070914	Lindera chunii	1.81	4.5
12021634	Enkianthus serrulatus	1.37	2
12060066	Enkianthus serrulatus	1.08	2.8
12020176	Enkianthus serrulatus	3.76	8
12050347	Enkianthus serrulatus	2.77	4
12060070	Enkianthus serrulatus	1.69	4
12065492	Enkianthus serrulatus	4.74	8
12033115	Enkianthus serrulatus	3.28	7
12079258	Enkianthus serrulatus	4.84	4
12079259	Enkianthus serrulatus	5.41	5
12099580	Enkianthus serrulatus	5.89	5
12033045	Enkianthus serrulatus	3.15	6
12070895	Alniphyllum fortunei	19.32	20
12099426	Alniphyllum fortunei	7.89	13
12058968	Alniphyllum fortunei	2.04	3
12025526	Alniphyllum fortunei	24.86	26
12062257	Alniphyllum fortunei	5.79	9
12062251	Alniphyllum fortunei	6.46	7.5
12078850	Lasianthus chinensis	1.02	1.7
12038073	Lasianthus chinensis	1.43	3.8
12386338	Lasianthus chinensis	1.2	2.2
12077353	Lasianthus chinensis	2.01	4.5
12077942	Lasianthus chinensis	1.81	2.8
12077267	Lasianthus chinensis	1.43	2.5
12077356	Lasianthus chinensis	1.66	3.8
12077493	Lasianthus chinensis	1.78	4.5
12077384	Ficus hirta	2.13	3.5
12001089	Ficus hirta	1.43	1.6
12001027	Ficus hirta	2.01	2.5
12078909	Ficus hirta	2.71	3.5
12077859	Ficus hirta	1.34	2.5
12001026	Ficus hirta	2.07	2
12077337	Ficus hirta	1.31	2.2
12077349	Ficus hirta	1.66	2.3
12078866	Ficus hirta	1.53	2.5
12386466	Ficus hirta	1.2	1.7
12077963	Ficus hirta	1.56	1.8
12077405	Ficus hirta	1.59	2.6
12077984	Ficus hirta	1.31	1.8
12053195	Zanthoxylum myriacanthum	1.27	1.6
12062279	Zanthoxylum myriacanthum	5.38	7
12025612	Zanthoxylum myriacanthum	20.24	18
12066766	Zanthoxylum myriacanthum	5.57	7
12072102	Zanthoxylum myriacanthum	3.02	3
12058967	Zanthoxylum myriacanthum	1.81	2
12066696	Zanthoxylum myriacanthum	2.55	2.5
12056380	Buxus megistophylla	3.12	2.8
12056381	Buxus megistophylla	3.5	5.5
12057647	Elaeocarpus decipiens	2.86	7.5
12064923	Elaeocarpus decipiens	9.77	14
12064975	Elaeocarpus decipiens	42.18	25
12060270	Elaeocarpus decipiens	15.44	15
12064946	Elaeocarpus decipiens	14.29	17
12064955	Elaeocarpus decipiens	19.48	20
12068813	Elaeocarpus decipiens	18.14	16
12029883	Elaeocarpus decipiens	25.46	23
12021738	Elaeocarpus decipiens	19.26	18
12058207	Elaeocarpus decipiens	33.74	28
12068812	Elaeocarpus decipiens	14.96	15
12058704	Elaeocarpus decipiens	17.51	18
12037165	Elaeocarpus decipiens	41.22	28
12020537	Elaeocarpus decipiens	52.68	28
12060373	Elaeocarpus decipiens	32.47	25
12059059	Elaeocarpus decipiens	5.51	14
12057628	Elaeocarpus decipiens	1.72	4.5
12061013	Elaeocarpus decipiens	44.53	30
12028970	Elaeocarpus decipiens	14.9	16
12025679	Elaeocarpus decipiens	38.67	25
12053133	Elaeocarpus decipiens	13.56	18
12069720	Elaeocarpus decipiens	38.77	27
12068839	Elaeocarpus decipiens	2.93	6
12068824	Elaeocarpus decipiens	11.14	15
12069612	Elaeocarpus decipiens	2.26	8
12037302	Elaeocarpus decipiens	24.83	23
12025085	Elaeocarpus decipiens	40.68	30
12075733	Elaeocarpus decipiens	3.6	3
12029493	Elaeocarpus decipiens	19.42	15
12025668	Elaeocarpus decipiens	22.09	20
12039141	Elaeocarpus decipiens	32.79	20
12058801	Elaeocarpus decipiens	37.4	25
12068825	Elaeocarpus decipiens	15.76	15
12072374	Elaeocarpus decipiens	31.19	25
12036812	Elaeocarpus decipiens	25.97	25
12021727	Elaeocarpus decipiens	21.17	23
12022447	Elaeocarpus decipiens	35.52	28
12000146	Elaeocarpus decipiens	16.87	20
12058696	Elaeocarpus decipiens	31.19	26
12022626	Elaeocarpus decipiens	1.46	3.5
12022603	Elaeocarpus decipiens	1.75	3.5
12077246	Elaeocarpus decipiens	38.99	23
12057434	Elaeocarpus decipiens	28.97	25
12063704	Elaeocarpus decipiens	14.26	17
12032321	Elaeocarpus decipiens	17.67	13
12099529	Elaeocarpus decipiens	29.7	20
12079414	Elaeocarpus decipiens	16.49	17
12079440	Elaeocarpus decipiens	25.24	25
12024971	Elaeocarpus decipiens	19.16	18
12024966	Elaeocarpus decipiens	18.78	18
12029999	Elaeocarpus decipiens	22.92	20
12029070	Elaeocarpus decipiens	23.05	19
12072475	Elaeocarpus decipiens	25.34	15
12077806	Elaeocarpus decipiens	41.16	28
12022595	Elaeocarpus decipiens	1.34	3
12022598	Elaeocarpus decipiens	2.77	7
12029810	Elaeocarpus decipiens	21.33	25
12057688	Elaeocarpus decipiens	1.08	4
12036833	Elaeocarpus decipiens	30.65	26
12036804	Elaeocarpus decipiens	35.33	27
12052236	Elaeocarpus decipiens	28.07	28
12065509	Elaeocarpus decipiens	18.94	20
12065510	Elaeocarpus decipiens	34.41	20
12065514	Elaeocarpus decipiens	22.54	19
12025272	Elaeocarpus decipiens	19.89	15.9
12025244	Elaeocarpus decipiens	2.13	3.8
12025332	Elaeocarpus decipiens	1	2.6
12061836	Elaeocarpus decipiens	25.37	25
12061152	Elaeocarpus decipiens	19.89	23
12061183	Elaeocarpus decipiens	26.42	25
12060160	Elaeocarpus decipiens	41.44	27
12039153	Elaeocarpus decipiens	29.76	20
12059293	Elaeocarpus decipiens	33.74	20
12065495	Elaeocarpus decipiens	21.07	18
12032323	Elaeocarpus decipiens	38.2	25
12022437	Elaeocarpus decipiens	16.04	18
12038375	Elaeocarpus decipiens	34.7	18
12038372	Elaeocarpus decipiens	16.55	16
12038369	Elaeocarpus decipiens	28.43	25
12026721	Elaeocarpus decipiens	35.21	28
12029891	Elaeocarpus decipiens	26.2	28
12029895	Elaeocarpus decipiens	18.84	18
12036320	Elaeocarpus decipiens	1.75	4
12032876	Elaeocarpus decipiens	66.85	25
12063728	Elaeocarpus decipiens	26.32	23
12063681	Elaeocarpus decipiens	16.07	18
12032250	Elaeocarpus decipiens	35.08	25
12023184	Elaeocarpus decipiens	31.07	25
12023122	Elaeocarpus decipiens	19.96	25
12072345	Elaeocarpus decipiens	33.84	20
12027954	Elaeocarpus decipiens	24.76	25
12070493	Elaeocarpus decipiens	1.56	3
12061882	Elaeocarpus decipiens	33.2	30
12061865	Elaeocarpus decipiens	23.01	28
12067565	Elaeocarpus decipiens	23.55	25
12057660	Elaeocarpus decipiens	1.91	5.5
12057670	Elaeocarpus decipiens	1.37	3
12064687	Elaeocarpus decipiens	1.18	2.5
12058026	Elaeocarpus decipiens	27.37	28
12058003	Elaeocarpus decipiens	40.36	28
12026357	Elaeocarpus decipiens	22.89	25
12031311	Elaeocarpus decipiens	25.15	18
12099411	Elaeocarpus decipiens	2.04	7
12072091	Elaeocarpus decipiens	13.62	15
12065469	Elaeocarpus decipiens	36.32	25
12024116	Elaeocarpus decipiens	2.04	3.8
12061101	Elaeocarpus decipiens	26.26	25
12061085	Elaeocarpus decipiens	34.06	30
12099373	Elaeocarpus decipiens	32.37	5
12058921	Elaeocarpus decipiens	32.34	25
12032404	Elaeocarpus decipiens	24.67	25
12063519	Elaeocarpus decipiens	31.42	25
12058839	Elaeocarpus decipiens	27.79	25
12072073	Elaeocarpus decipiens	25.88	20
12035567	Elaeocarpus decipiens	22.66	18
12021715	Elaeocarpus decipiens	38.52	28
12039457	Elaeocarpus decipiens	27.6	25
12028001	Elaeocarpus decipiens	13.69	15
12072804	Elaeocarpus decipiens	44.21	25
12022500	Elaeocarpus decipiens	5.25	7
12022660	Elaeocarpus decipiens	1.75	4.5
12061438	Elaeocarpus decipiens	1.94	4
12068662	Elaeocarpus decipiens	34.85	30
12064652	Elaeocarpus decipiens	20.28	18
12076634	Elaeocarpus decipiens	40.27	20
12079299	Elaeocarpus decipiens	31.7	26
12060849	Elaeocarpus decipiens	4.93	7.5
12062091	Elaeocarpus decipiens	1.34	3
12037722	Elaeocarpus decipiens	26.42	15
12027872	Elaeocarpus decipiens	15.44	15
12056020	Elaeocarpus decipiens	19.39	22
12056036	Elaeocarpus decipiens	15.5	18
12058395	Elaeocarpus decipiens	27.79	28
12058368	Elaeocarpus decipiens	14.77	17
12079322	Elaeocarpus decipiens	15.88	18
12036891	Elaeocarpus decipiens	37.72	28
12068718	Elaeocarpus decipiens	20.69	18
12035440	Elaeocarpus decipiens	24.26	25
12060819	Elaeocarpus decipiens	26.36	23
12079446	Elaeocarpus decipiens	23.49	20
12078157	Elaeocarpus decipiens	21.58	25
12026316	Elaeocarpus decipiens	25.34	18
12072281	Elaeocarpus decipiens	17.63	18
12060951	Elaeocarpus decipiens	21.01	25
12025288	Elaeocarpus decipiens	1.08	2.6
12079535	Elaeocarpus decipiens	33.9	24
12099324	Elaeocarpus decipiens	23.46	23
12069262	Elaeocarpus decipiens	1.88	4.5
12032421	Elaeocarpus decipiens	25.02	25
12020254	Elaeocarpus decipiens	36.29	28
12036228	Elaeocarpus decipiens	44.88	25
12022611	Elaeocarpus decipiens	1.81	3.8
12062627	Elaeocarpus decipiens	33.42	26
12062619	Elaeocarpus decipiens	11.78	13
12063679	Elaeocarpus decipiens	26.29	18
12022594	Elaeocarpus decipiens	1.21	3
12022608	Elaeocarpus decipiens	1.91	3
12022605	Elaeocarpus decipiens	1.11	2.5
12038350	Elaeocarpus decipiens	20.09	20
12072231	Elaeocarpus decipiens	28.33	18
12039590	Elaeocarpus decipiens	31.26	25
12021601	Elaeocarpus decipiens	38.36	28
12059224	Elaeocarpus decipiens	31.42	25
12067348	Elaeocarpus decipiens	22.28	18
12025773	Elaeocarpus decipiens	9.45	15
12061792	Elaeocarpus decipiens	2.2	6
12072260	Elaeocarpus decipiens	19.8	18
12072190	Elaeocarpus decipiens	20.69	18
12035451	Elaeocarpus decipiens	26.17	20
12026289	Elaeocarpus decipiens	23.87	23
12056577	Elaeocarpus decipiens	44.72	25
12035450	Elaeocarpus decipiens	25.97	18
12039796	Elaeocarpus decipiens	1.43	3
12022593	Elaeocarpus decipiens	1.37	2.8
12022723	Elaeocarpus decipiens	1.46	2.5
12039304	Elaeocarpus decipiens	37.56	25
12072770	Elaeocarpus decipiens	40.52	28
12059578	Heteropanax brevipedicellatus	1.24	2.2
12058278	Heteropanax brevipedicellatus	3.06	4
12067894	Heteropanax brevipedicellatus	1.43	1.8
12061854	Heteropanax brevipedicellatus	3.18	5.5
12057535	Heteropanax brevipedicellatus	2.04	2.2
12057509	Heteropanax brevipedicellatus	1.43	2.2
12067937	Heteropanax brevipedicellatus	1.75	2.5
12059220	Heteropanax brevipedicellatus	1.72	2.8
12026267	Heteropanax brevipedicellatus	2.9	4
12096482	Heteropanax brevipedicellatus	2.01	2.3
12067931	Heteropanax brevipedicellatus	2.61	3.5
12061929	Heteropanax brevipedicellatus	2.99	4
12023033	Heteropanax brevipedicellatus	1.59	2.5
12020298	Heteropanax brevipedicellatus	4.97	6
12036850	Heteropanax brevipedicellatus	2.8	6
12070214	Heteropanax brevipedicellatus	1.27	2.5
12076355	Heteropanax brevipedicellatus	2.07	3
12069310	Heteropanax brevipedicellatus	4.11	3.8
12056349	Heteropanax brevipedicellatus	2.23	5
12061963	Heteropanax brevipedicellatus	4.17	4
12063677	Heteropanax brevipedicellatus	3.25	4
12030207	Heteropanax brevipedicellatus	1.56	2.3
12096439	Heteropanax brevipedicellatus	1.97	3
12020101	Heteropanax brevipedicellatus	4.49	6
12058145	Heteropanax brevipedicellatus	4.62	7
12071900	Heteropanax brevipedicellatus	4.01	7
12387389	Heteropanax brevipedicellatus	5	2.5
12077401	Heteropanax brevipedicellatus	3.98	7.5
12059531	Heteropanax brevipedicellatus	7	8.5
12078163	Heteropanax brevipedicellatus	2.07	3
12028079	Heteropanax brevipedicellatus	5.63	8
12020594	Heteropanax brevipedicellatus	3.76	4.5
12037665	Heteropanax brevipedicellatus	4.87	6
12027843	Heteropanax brevipedicellatus	6.84	11
12035689	Heteropanax brevipedicellatus	5.22	9
12020053	Heteropanax brevipedicellatus	5.92	7
12059552	Heteropanax brevipedicellatus	6.05	7
12004711	Heteropanax brevipedicellatus	1.75	2.8
12066692	Heteropanax brevipedicellatus	4.77	5
12039641	Heteropanax brevipedicellatus	2.55	4
12061149	Heteropanax brevipedicellatus	2.23	3.5
12022788	Heteropanax brevipedicellatus	1.59	2.3
12060149	Heteropanax brevipedicellatus	2.04	4
12052335	Heteropanax brevipedicellatus	2.77	4
12058760	Heteropanax brevipedicellatus	1.27	5
12031310	Heteropanax brevipedicellatus	5.67	7
12062786	Heteropanax brevipedicellatus	6.3	5
12036978	Heteropanax brevipedicellatus	5.83	8
12062775	Heteropanax brevipedicellatus	6.05	9
12035589	Heteropanax brevipedicellatus	3.57	6
12037679	Heteropanax brevipedicellatus	4.93	6
12021678	Heteropanax brevipedicellatus	4.77	7.5
12079990	Heteropanax brevipedicellatus	3.18	5
12079823	Heteropanax brevipedicellatus	2.83	3
12059546	Heteropanax brevipedicellatus	3.5	7.5
12030005	Heteropanax brevipedicellatus	4.55	6
12074202	Heteropanax brevipedicellatus	4.27	7
12078637	Heteropanax brevipedicellatus	2.04	3.2
12063646	Heteropanax brevipedicellatus	3.6	4
12021555	Heteropanax brevipedicellatus	1.37	2.2
12052221	Heteropanax brevipedicellatus	12.13	13
12035620	Heteropanax brevipedicellatus	6.4	7
12025319	Heteropanax brevipedicellatus	8.53	10
12058609	Heteropanax brevipedicellatus	7.16	14
12063094	Heteropanax brevipedicellatus	9.26	13
12057437	Heteropanax brevipedicellatus	2.48	3.8
12058064	Heteropanax brevipedicellatus	2.07	3
12068809	Heteropanax brevipedicellatus	5.63	7
12068837	Heteropanax brevipedicellatus	3.02	5
12074254	Heteropanax brevipedicellatus	7.8	8
12055082	Machilus breviflora	1.69	4
12029561	Machilus breviflora	11.46	15
12026680	Machilus breviflora	1.97	3.5
12026682	Machilus breviflora	1.62	3
12064755	Machilus breviflora	1.53	2.5
12026681	Machilus breviflora	1.85	2.8
12026717	Machilus breviflora	18.78	25
12065878	Machilus breviflora	1.18	4
12069680	Machilus breviflora	1.34	2.8
12057513	Machilus breviflora	2.71	3.5
12064732	Machilus breviflora	1.69	2.5
12069616	Machilus breviflora	11.14	15
12063017	Machilus breviflora	1.46	3
12064733	Machilus breviflora	2.01	4.5
12065879	Machilus breviflora	1.69	4
12386943	Machilus breviflora	1.1	2.3
12037069	Machilus breviflora	11.36	15
12065929	Machilus breviflora	3.06	7
12068841	Machilus breviflora	16.77	16
12038388	Machilus breviflora	1.91	2.8
12025011	Machilus breviflora	1.27	2.5
12037083	Machilus breviflora	9.8	12
12055040	Machilus breviflora	1.91	4
12057476	Machilus breviflora	1.18	2.2
12057579	Machilus breviflora	1.66	3
12065874	Machilus breviflora	1.34	3
12053085	Machilus breviflora	1.18	2.4
12078924	Machilus breviflora	1.91	2.6
12078607	Machilus breviflora	2.9	6.5
12058677	Machilus breviflora	14.8	13
12037221	Machilus breviflora	1.53	3
12069681	Machilus breviflora	2.01	5.5
12072562	Machilus breviflora	1.88	4
12037158	Machilus breviflora	5.32	8
12037139	Machilus breviflora	4.62	7
12077434	Machilus breviflora	1.75	3.5
12054374	Machilus breviflora	2.99	6
12054380	Machilus breviflora	1.02	2.5
12069618	Machilus breviflora	1.11	2.5
12069619	Machilus breviflora	6.37	13
12029576	Machilus breviflora	2.16	4
12068810	Machilus breviflora	4.62	10
12078593	Machilus breviflora	2.04	3.8
12066469	Machilus breviflora	1.97	4
12066464	Machilus breviflora	5.63	9
12066460	Machilus breviflora	1.34	3
12066513	Machilus breviflora	5.83	7
12059231	Machilus breviflora	2.01	3
12059320	Machilus breviflora	9.96	13
12077567	Machilus breviflora	3.57	7
12077597	Machilus breviflora	2.07	4
12053127	Machilus breviflora	15.92	22
12029580	Machilus breviflora	1.02	2
12057501	Machilus breviflora	1.69	3
12065585	Machilus breviflora	16.87	18
12057745	Machilus breviflora	3.02	9
12057617	Machilus breviflora	1.34	3
12057723	Machilus breviflora	4.77	7
12057759	Machilus breviflora	7.32	12
12054594	Machilus breviflora	3.18	9
12057679	Machilus breviflora	2.86	7.5
12057678	Machilus breviflora	4.62	10
12057680	Machilus breviflora	1.27	3.5
12057685	Machilus breviflora	3.34	8
12059572	Machilus breviflora	1.02	2.3
12057646	Machilus breviflora	1.05	2.3
12057697	Machilus breviflora	4.46	9
12057698	Machilus breviflora	2.86	7
12057706	Machilus breviflora	6.37	11
12076503	Machilus breviflora	2.01	4.5
12076554	Machilus breviflora	2.55	6.5
12076760	Machilus breviflora	1.18	3.5
12057521	Machilus breviflora	1.53	4
12057468	Machilus breviflora	3.47	7
12057471	Machilus breviflora	9.74	15
12057570	Machilus breviflora	2.26	4.5
12057572	Machilus breviflora	1.81	4
12057686	Machilus breviflora	2.23	5.5
12057687	Machilus breviflora	1.59	4
12057580	Machilus breviflora	13.91	18
12058067	Machilus breviflora	1	2.3
12057484	Machilus breviflora	1.75	5.5
12066471	Machilus breviflora	9.26	15
12065924	Machilus breviflora	2.13	4.5
12065957	Machilus breviflora	12.51	16
12021630	Machilus breviflora	18.37	15
12021651	Machilus breviflora	1.27	2.8
12036967	Machilus breviflora	4.3	6.5
10018981	Machilus breviflora	1.21	3.3
12030102	Machilus breviflora	14.77	16
12057512	Machilus breviflora	1.18	1.8
12070290	Machilus breviflora	4.81	10
12065431	Machilus breviflora	12.61	17
12065493	Machilus breviflora	2.29	3.5
12078609	Machilus breviflora	1.62	4.5
12078927	Machilus breviflora	1.46	3
12065589	Machilus breviflora	1.69	3
12001113	Machilus breviflora	14.71	15
12001022	Machilus breviflora	3.34	7
12031089	Machilus breviflora	4.71	4
12031080	Machilus breviflora	4.55	8
12031007	Machilus breviflora	2.1	4.5
12031076	Machilus breviflora	4.62	6
12074375	Machilus breviflora	3.66	7
12074265	Machilus breviflora	4.17	11
12074368	Machilus breviflora	1.15	2.2
12074339	Machilus breviflora	2.13	4.5
12074334	Machilus breviflora	1.34	2.8
12032960	Machilus breviflora	1.59	3.8
12037647	Machilus breviflora	1.11	2.5
12027848	Machilus breviflora	8.82	13
12027841	Machilus breviflora	2.01	4
12027838	Machilus breviflora	1.69	4.2
12027839	Machilus breviflora	1.62	3.8
12388592	Machilus breviflora	3.25	3
12022977	Machilus breviflora	2.29	3
12027853	Machilus breviflora	4.39	7
12027850	Machilus breviflora	5.6	7
12037099	Machilus breviflora	1.4	2.5
12070506	Machilus breviflora	3.18	7.5
12061596	Machilus breviflora	4.55	11
12060804	Machilus breviflora	1.46	2.6
12052246	Machilus breviflora	1.21	2.2
12055242	Machilus breviflora	1.75	3.8
12062033	Machilus breviflora	1.27	3
12062029	Machilus breviflora	1.43	3
12062043	Machilus breviflora	1.15	2.3
12062076	Machilus breviflora	4.3	5
12062057	Machilus breviflora	1.02	2.5
12062117	Machilus breviflora	1.34	2.5
12062118	Machilus breviflora	1.91	3.5
12069380	Machilus breviflora	2.39	5
12078491	Machilus breviflora	3.25	5.5
12078410	Machilus breviflora	4.3	4.5
12057737	Machilus breviflora	6.37	12
12063786	Machilus breviflora	2.32	5
12030230	Machilus breviflora	1.66	2.8
12030223	Machilus breviflora	1.43	3
12078564	Machilus breviflora	4.9	7.5
12078600	Machilus breviflora	3.41	7
12055170	Machilus breviflora	1	2.2
12058684	Machilus breviflora	1.59	4.5
12062372	Machilus breviflora	1.66	3
12056575	Machilus breviflora	7	12
12056578	Machilus breviflora	1.37	2.3
12056244	Machilus breviflora	2.23	3
12067467	Machilus breviflora	4.39	5
12056225	Machilus breviflora	1.34	2.8
12056592	Machilus breviflora	1.43	1.8
12029480	Machilus breviflora	2.23	4.5
12056205	Machilus breviflora	1.37	2.3
12056526	Machilus breviflora	10.5	13
12050350	Machilus breviflora	21.71	18
12050203	Machilus breviflora	13.02	15
12072545	Machilus breviflora	2.32	6
12077511	Machilus breviflora	3.53	7.6
12050235	Machilus breviflora	12.1	15
12050263	Machilus breviflora	1.43	2.6
12026381	Machilus breviflora	2.32	4
12026268	Machilus breviflora	2.74	5
12058027	Machilus breviflora	1.05	2.5
12026241	Machilus breviflora	2.64	4
12060805	Machilus breviflora	5.28	11
12052290	Machilus breviflora	1.56	3.8
12099503	Machilus breviflora	3.76	7
12099504	Machilus breviflora	1.53	3
12099500	Machilus breviflora	3.18	5
12099492	Machilus breviflora	2.74	5
12099470	Machilus breviflora	1.59	2.5
12074330	Machilus breviflora	3.15	7
12099592	Machilus breviflora	2.16	5
12099403	Machilus breviflora	1.78	5
12030044	Machilus breviflora	2.55	6
12030045	Machilus breviflora	2.58	6.5
12030123	Machilus breviflora	14.01	11
12035797	Machilus breviflora	1.5	3
12035727	Machilus breviflora	2.9	6
12020019	Machilus breviflora	3.44	7
12026698	Machilus breviflora	8.88	13
12026673	Machilus breviflora	1.72	3.5
12035815	Machilus breviflora	14.96	15
12077970	Machilus breviflora	1.43	3
12077677	Machilus breviflora	1.43	2.5
12058111	Machilus breviflora	1.43	2.8
12058113	Machilus breviflora	1.72	4.2
12058171	Machilus breviflora	3.66	5
12058135	Machilus breviflora	1.72	4
12058879	Machilus breviflora	2.29	5
12058980	Machilus breviflora	1.03	1.7
12065974	Machilus breviflora	2.48	7.5
12057526	Machilus breviflora	5.44	9
12057557	Machilus breviflora	1.53	3.8
12057562	Machilus breviflora	2.71	5.5
12068964	Machilus breviflora	9.55	13
12068896	Machilus breviflora	9.39	15
12068875	Machilus breviflora	4.62	7
12068881	Machilus breviflora	13.37	18
12039703	Machilus breviflora	13.08	15
12070572	Machilus breviflora	2.36	4.5
12037185	Machilus breviflora	2.61	5
12386266	Machilus breviflora	1	2
12039730	Machilus breviflora	3.66	7
12039785	Machilus breviflora	6.14	14
12039721	Machilus breviflora	13.94	11
12385463	Machilus breviflora	1	2.3
12020425	Machilus breviflora	1.97	4
12020410	Machilus breviflora	1.72	2.5
12020439	Machilus breviflora	11.05	15
12020163	Machilus breviflora	1.66	3
12025907	Machilus breviflora	7.38	14
12021533	Machilus breviflora	1.43	2.7
12021556	Machilus breviflora	1.85	3.5
12021553	Machilus breviflora	2.86	6.5
12038079	Machilus breviflora	9.8	10
12078979	Machilus breviflora	2.36	5
12065590	Machilus breviflora	1.46	2.5
12065591	Machilus breviflora	2.96	5
12058202	Machilus breviflora	21.52	22
12067939	Machilus breviflora	10.98	16
12032228	Machilus breviflora	8.15	13
12078426	Machilus breviflora	9.74	10
12078566	Machilus breviflora	1.43	3.8
12072979	Machilus breviflora	1.24	2.3
12386793	Machilus breviflora	1.06	2.1
12024014	Machilus breviflora	13.21	15
12059049	Machilus breviflora	1.37	2.2
12067558	Machilus breviflora	11.3	15
12032395	Machilus breviflora	15.28	18
12033236	Machilus breviflora	17.22	20
12386933	Machilus breviflora	1.2	2.3
12022787	Machilus breviflora	3.92	6
12069012	Machilus breviflora	1.31	3.5
12039395	Machilus breviflora	1.34	2.5
12069601	Machilus breviflora	1.62	3
12039393	Machilus breviflora	1.43	2.4
12072301	Machilus breviflora	1.91	3
12024268	Machilus breviflora	2.13	3.8
12024287	Machilus breviflora	2.39	4.5
12024277	Machilus breviflora	1.11	2.3
12024264	Machilus breviflora	2.04	4
12020591	Machilus breviflora	23.01	20
12039478	Machilus breviflora	2.67	6
12039086	Machilus breviflora	1.43	1.8
12039416	Machilus breviflora	2.01	3.8
12021709	Machilus breviflora	13.27	17
12021704	Machilus breviflora	2.07	3.5
12038162	Machilus breviflora	1.59	3.5
12038188	Machilus breviflora	1.78	3.5
12021779	Machilus breviflora	1.88	2.8
12021671	Machilus breviflora	4.39	4.5
12078997	Machilus breviflora	2.64	3.8
12078652	Machilus breviflora	2.36	5
12078640	Machilus breviflora	1.66	4
12069079	Machilus breviflora	4.55	8
12069080	Machilus breviflora	2.07	4
12022532	Machilus breviflora	9.8	15
12078466	Machilus breviflora	1.72	3.5
12079381	Machilus breviflora	16.23	16
12079307	Machilus breviflora	1.88	3.8
12079306	Machilus breviflora	1.66	3.5
12079325	Machilus breviflora	2.39	4
12038257	Machilus breviflora	1.75	4
12062282	Machilus breviflora	1.75	4
12032047	Machilus breviflora	1.34	2.8
12032155	Machilus breviflora	9.74	13
12004750	Machilus breviflora	2.71	4
12004761	Machilus breviflora	4.36	6.5
12032025	Machilus breviflora	1.59	2.8
12032015	Machilus breviflora	4.62	4.5
12032183	Machilus breviflora	4.46	6
12067490	Machilus breviflora	3.09	5
12037073	Machilus breviflora	7.93	14
12037058	Machilus breviflora	8.63	13
12032423	Machilus breviflora	7.93	14
12037014	Machilus breviflora	13.5	18
12067335	Machilus breviflora	1.46	2.8
12050249	Machilus breviflora	23.91	23
12022998	Machilus breviflora	1.18	2.3
12026480	Machilus breviflora	10.35	15
12026441	Machilus breviflora	17.73	18
12026560	Machilus breviflora	1.59	2.3
12096501	Machilus breviflora	2.23	4
12026514	Machilus breviflora	1.37	2.5
12099550	Machilus breviflora	1.24	2.8
12026456	Machilus breviflora	1.27	3.2
12021615	Machilus breviflora	1.34	2.1
12036944	Machilus breviflora	1.75	2.5
12036945	Machilus breviflora	8.98	13
12071907	Machilus breviflora	1.69	3.8
12071942	Machilus breviflora	2.8	5
12060049	Machilus breviflora	14.9	18
12057077	Machilus breviflora	16.62	25
12079762	Machilus breviflora	1.59	2.8
12079612	Machilus breviflora	1.78	4
12070590	Machilus breviflora	2.39	5.5
12078730	Machilus breviflora	2.77	5
12078722	Machilus breviflora	2.55	5.5
12070392	Machilus breviflora	3.66	5
12078739	Machilus breviflora	2.07	4.5
12079685	Machilus breviflora	3.63	6.5
12079668	Machilus breviflora	1.11	2.5
12079687	Machilus breviflora	1	2.5
12079702	Machilus breviflora	3.57	6
12056080	Machilus breviflora	2.93	6
12054267	Machilus breviflora	1.97	4
12054264	Machilus breviflora	2.26	5
12054245	Machilus breviflora	1.37	2.5
12054236	Machilus breviflora	3.69	6
12068706	Machilus breviflora	1.75	3.5
12068773	Machilus breviflora	1.24	3
12068772	Machilus breviflora	1.18	2
12064701	Machilus breviflora	1.53	2.8
12387264	Machilus breviflora	1.25	3
12020372	Machilus breviflora	1.43	2.3
12020350	Machilus breviflora	4.2	5
12020303	Machilus breviflora	1.5	2.5
12020302	Machilus breviflora	2.64	4
12020339	Machilus breviflora	3.66	7
12020319	Machilus breviflora	1.62	3.8
12039765	Machilus breviflora	14.23	16
12022407	Machilus breviflora	5	8.5
12026427	Machilus breviflora	7.48	8
12026424	Machilus breviflora	1.34	3
12386863	Machilus breviflora	1.1	2.7
12072771	Machilus breviflora	2.39	4.5
12072718	Machilus breviflora	1.69	2.5
12072781	Machilus breviflora	10.35	15
12072710	Machilus breviflora	1.31	2.8
12072709	Machilus breviflora	3.63	7
12023032	Machilus breviflora	14.8	18
12023041	Machilus breviflora	2.48	5
12023016	Machilus breviflora	6.43	8
12079415	Machilus breviflora	1.43	3
12079487	Machilus breviflora	1.97	3.8
12079778	Machilus breviflora	1	2.2
12079786	Machilus breviflora	3.53	5.5
12078824	Machilus breviflora	4.14	6.6
12078960	Machilus breviflora	2.07	4
12066671	Machilus breviflora	2.16	4.5
12066670	Machilus breviflora	5.12	7.5
12058334	Machilus breviflora	1.02	2
12022612	Machilus breviflora	6.46	10
12072715	Machilus breviflora	1.11	1.7
12021064	Machilus breviflora	1.85	3.8
12038314	Machilus breviflora	1.56	4
12037237	Machilus breviflora	2.39	4.5
12386261	Machilus breviflora	1.1	3
12025142	Machilus breviflora	2.39	4.5
12096480	Machilus breviflora	3.25	6
12025098	Machilus breviflora	1.43	2.3
12025036	Machilus breviflora	1.08	2.3
12029616	Machilus breviflora	1.53	2
12029617	Machilus breviflora	1.43	2.5
12029779	Machilus breviflora	1.27	2
12039394	Machilus breviflora	16.55	23
12029438	Machilus breviflora	1.27	2.5
12029437	Machilus breviflora	2.99	5
12076660	Machilus breviflora	2.9	6
12077295	Machilus breviflora	1.37	2.3
12059410	Machilus breviflora	1.43	4
12059409	Machilus breviflora	1.34	2.6
12024265	Machilus breviflora	3.92	7
12024143	Machilus breviflora	1.75	3.8
12061107	Machilus breviflora	7.64	14
12061138	Machilus breviflora	11.62	16
12060124	Machilus breviflora	1.94	4.3
12060123	Machilus breviflora	1.4	2.5
12060122	Machilus breviflora	1.59	1.8
12059017	Machilus breviflora	2.01	3
12057148	Machilus breviflora	14.51	15
12063537	Machilus breviflora	19.48	25
12063404	Machilus breviflora	9.71	13
12033087	Machilus breviflora	11.9	15
12069045	Machilus breviflora	1.34	2.5
12063716	Machilus breviflora	1.4	4
12063733	Machilus breviflora	1.46	3.2
12063732	Machilus breviflora	1.72	2.6
12079385	Machilus breviflora	1.81	3.5
12063756	Machilus breviflora	2.39	4
12063759	Machilus breviflora	2.36	4.5
12061432	Machilus breviflora	4.55	7
12061488	Machilus breviflora	3.53	5.5
12061401	Machilus breviflora	4.14	10
12032829	Machilus breviflora	14.32	15
12036374	Machilus breviflora	3.34	5
12062330	Machilus breviflora	11.2	13
12036336	Machilus breviflora	4.33	6
12036333	Machilus breviflora	2.04	4
12036344	Machilus breviflora	4.62	6
12036321	Machilus breviflora	1.94	4
12036322	Machilus breviflora	3.18	5
12004741	Machilus breviflora	3.82	4
12004732	Machilus breviflora	1.11	1.5
12072140	Machilus breviflora	2.77	4
12072103	Machilus breviflora	1.85	3
12072114	Machilus breviflora	3.5	5
12024363	Machilus breviflora	3.95	6
12024362	Machilus breviflora	1.27	3.5
12071972	Machilus breviflora	2.2	4
12071981	Machilus breviflora	9.77	12
12024364	Machilus breviflora	2.2	4.5
12024334	Machilus breviflora	2.67	5.5
12026534	Machilus breviflora	7	15
12071967	Machilus breviflora	2.45	3
12071969	Machilus breviflora	4.74	7
12070247	Machilus breviflora	2.61	2.5
12071970	Machilus breviflora	1.91	3.5
12070257	Machilus breviflora	2.64	6
12024301	Machilus breviflora	18.91	15
12052365	Machilus breviflora	1.18	2
12052366	Machilus breviflora	8.4	15
12057431	Machilus breviflora	1.4	2.5
12057440	Machilus breviflora	1.85	5
12057078	Machilus breviflora	1.02	2
12056343	Machilus breviflora	18.27	16
12032475	Machilus breviflora	1.91	1.8
12028004	Machilus breviflora	1.27	2.5
12057652	Machilus breviflora	3.18	7
12028103	Machilus breviflora	1.34	4
12028124	Machilus breviflora	3.63	8
12074389	Machilus breviflora	2.29	4.5
12099291	Machilus breviflora	1.15	2.8
12036244	Machilus breviflora	2.13	4
12070836	Machilus breviflora	1.62	3
12079363	Machilus breviflora	1.18	2.3
12036388	Machilus breviflora	3.18	6
12062215	Machilus breviflora	2.2	4
12025240	Machilus breviflora	18.68	17
12025230	Machilus breviflora	3.5	5.5
12025341	Machilus breviflora	1.05	2.4
12025330	Machilus breviflora	5.35	9
12070795	Machilus breviflora	1.5	3
12070776	Machilus breviflora	2.01	3.6
12070665	Machilus breviflora	1.97	2.8
12070651	Machilus breviflora	3.12	5
12070720	Machilus breviflora	2.51	5
12387059	Machilus breviflora	1.05	2.5
12070737	Machilus breviflora	3.28	7
12070355	Machilus breviflora	4.3	7
12070491	Machilus breviflora	4.97	11
12070471	Machilus breviflora	3.21	4.5
12020330	Machilus breviflora	2.58	5
12062119	Machilus breviflora	2.07	3.8
12059475	Machilus breviflora	1.11	2.5
12059467	Machilus breviflora	1.56	3
12059495	Machilus breviflora	1.21	3
12059519	Machilus breviflora	2.71	5
12059541	Machilus breviflora	1.05	2.5
12057427	Machilus breviflora	1.56	3.8
12025407	Machilus breviflora	12.67	13
12025546	Machilus breviflora	12.99	20
12070547	Machilus breviflora	4.55	9
12061957	Machilus breviflora	9.23	14
12052313	Machilus breviflora	1.27	2.8
12063619	Machilus breviflora	3.09	5
12061978	Machilus breviflora	1.56	3
12062116	Machilus breviflora	1.91	3
12066788	Machilus breviflora	1.97	4
12066774	Machilus breviflora	2.39	3.2
12061450	Machilus breviflora	6.02	12
12058259	Machilus breviflora	1.18	2.3
12061449	Machilus breviflora	8.75	12
12344658	Machilus breviflora	1	2.8
12069602	Machilus breviflora	1.27	2.2
12070867	Machilus breviflora	10.73	10
12032118	Machilus breviflora	1.91	4
12025378	Machilus breviflora	11.46	15
12035426	Machilus breviflora	8.05	13
12065809	Machilus breviflora	4.01	7
12063715	Machilus breviflora	2.26	4
12061982	Machilus breviflora	1.08	2.5
12024338	Machilus breviflora	3.69	6.5
12028076	Machilus breviflora	1.69	5
12068620	Machilus breviflora	1.11	1.7
12076342	Machilus breviflora	8.21	11
12029780	Machilus breviflora	1.75	4
12061960	Machilus breviflora	2.23	6
12064698	Machilus breviflora	1.56	3
12037015	Machilus breviflora	1.59	2.8
12032418	Machilus breviflora	1.11	2.5
12061578	Machilus breviflora	3.76	7
12037753	Machilus breviflora	4.3	6
12026521	Machilus breviflora	8.56	14
12061903	Machilus breviflora	9.36	10
12070581	Machilus breviflora	2.16	5.5
12061403	Machilus breviflora	1.37	3
12035412	Machilus breviflora	15.92	18
12061448	Machilus breviflora	1.15	2.2
12025227	Machilus breviflora	1.53	5
12061902	Machilus breviflora	4.07	7
12025479	Machilus breviflora	7.42	7
12038431	Machilus breviflora	2.93	5
12061453	Machilus breviflora	11.94	15
12027985	Machilus breviflora	1.81	4
12038498	Machilus breviflora	8.31	7
12038432	Machilus breviflora	2.71	6
12035428	Machilus breviflora	2.23	3
12061855	Machilus breviflora	5.73	6.5
12048525	Ficus hispida	3.88	5.5
12075735	Ficus hispida	1.43	1.7
12048530	Ficus hispida	1.56	2
12032107	Ficus hispida	1.75	2.3
12032108	Ficus hispida	2.39	3
12057708	Meliosma fordii	4.77	13
12070535	Meliosma fordii	1.43	3
12079190	Meliosma fordii	1.97	4
12070295	Meliosma fordii	4.84	6
12070712	Meliosma fordii	3.82	5
12037703	Meliosma fordii	1.02	2
12031045	Meliosma fordii	4.65	7.5
12078794	Meliosma fordii	1.78	3.8
12077218	Meliosma fordii	9.17	14
12070260	Meliosma fordii	4.2	6
12077338	Meliosma fordii	10.19	13
12037704	Meliosma fordii	1.21	2.5
12072243	Garcinia multiflora	2.58	4.5
12065848	Garcinia multiflora	2.93	6.5
12058320	Garcinia multiflora	12.29	16
12029563	Garcinia multiflora	17.83	16
12056187	Garcinia multiflora	2.2	4
12025014	Garcinia multiflora	7.32	9
12029572	Garcinia multiflora	8.59	11
12024068	Garcinia multiflora	6.4	13
12031358	Garcinia multiflora	7.07	7.5
12036838	Garcinia multiflora	9.96	20
12055053	Garcinia multiflora	2.39	5
12065899	Garcinia multiflora	8.88	15
12078158	Garcinia multiflora	3.5	5
12099451	Garcinia multiflora	6.11	8
12065481	Garcinia multiflora	12.99	17
12024797	Garcinia multiflora	19.74	20
12065930	Garcinia multiflora	12.13	16
12023044	Garcinia multiflora	12.1	18
12052293	Garcinia multiflora	5.57	8
12052369	Garcinia multiflora	2.45	5.5
12029451	Garcinia multiflora	14.01	10
12024082	Garcinia multiflora	7.64	15
12065941	Garcinia multiflora	8.24	17
12020133	Garcinia multiflora	15.63	18
12063033	Garcinia multiflora	5.19	6
12072427	Garcinia multiflora	1.59	3
12057458	Garcinia multiflora	13.34	20
12068656	Garcinia multiflora	11.46	20
12068703	Garcinia multiflora	6.37	14
12029409	Garcinia multiflora	4.77	9
12075792	Garcinia multiflora	7.7	9
12076670	Garcinia multiflora	17.95	20
12072723	Garcinia multiflora	3.37	5
12079993	Garcinia multiflora	8.12	9
12079268	Garcinia multiflora	1.21	1.8
12079303	Garcinia multiflora	10.98	6
12060385	Garcinia multiflora	1.31	2.8
12032160	Garcinia multiflora	10.98	14
12026647	Garcinia multiflora	20.56	18
12038277	Garcinia multiflora	1.72	3.5
12022614	Garcinia multiflora	3.06	4
12022596	Garcinia multiflora	2.58	2.8
12065987	Garcinia multiflora	13.88	16
12068669	Garcinia multiflora	10.35	18
12023035	Garcinia multiflora	8.91	13
12055085	Garcinia multiflora	12.1	16
12036813	Garcinia multiflora	10.82	17
12072362	Garcinia multiflora	10.79	14
12036359	Garcinia multiflora	10.35	15
12079351	Garcinia multiflora	1.69	3.5
12070699	Garcinia multiflora	11.36	14
12060911	Garcinia multiflora	5.25	7
12035540	Garcinia multiflora	9.17	13
12033261	Garcinia multiflora	2.42	5
12069024	Garcinia multiflora	2.1	3
12022718	Garcinia multiflora	2.32	3
12028199	Garcinia multiflora	1.91	2.8
12074335	Garcinia multiflora	2.8	3.8
12032985	Garcinia multiflora	9.23	12
12061980	Garcinia multiflora	9.9	11
12061904	Garcinia multiflora	4.62	6
12024234	Garcinia multiflora	6.56	12
12036371	Garcinia multiflora	11.62	12
12063719	Garcinia multiflora	8.79	13
12030248	Garcinia multiflora	10.54	15
12057539	Garcinia multiflora	2.23	4
12038287	Garcinia multiflora	2.83	4.5
12026252	Garcinia multiflora	3.02	6
12024270	Garcinia multiflora	11.24	14
12033393	Garcinia multiflora	8.75	15
12033022	Garcinia multiflora	3.12	6
12076638	Garcinia multiflora	11.78	18
12069073	Garcinia multiflora	11.36	15
12072946	Garcinia multiflora	1.15	2.5
12023197	Garcinia multiflora	2.07	3
12052316	Garcinia multiflora	7.07	7.5
12069621	Garcinia multiflora	2.8	5.5
12037135	Garcinia multiflora	10.73	13
12072056	Garcinia multiflora	2.39	4.5
12056332	Garcinia multiflora	1.56	2.8
12056289	Garcinia multiflora	7.32	11
12067952	Garcinia multiflora	13.56	13
12072973	Garcinia multiflora	11.71	15
12037186	Garcinia multiflora	1.69	2.5
12020400	Garcinia multiflora	7.83	15
12099205	Garcinia multiflora	3.82	5
12058627	Garcinia multiflora	2.04	6
12063070	Garcinia multiflora	9.77	17
12099235	Garcinia multiflora	8.02	13
12063713	Garcinia multiflora	5.47	9
12058784	Garcinia multiflora	2.07	6
12020586	Garcinia multiflora	12.25	16
12061583	Garcinia multiflora	8.91	13
12055255	Garcinia multiflora	22.28	18
12062125	Garcinia multiflora	17.13	15
12050366	Garcinia multiflora	8.66	13
12078647	Garcinia multiflora	4.68	7
12078629	Garcinia multiflora	8.98	13
12078627	Garcinia multiflora	5.67	9
12028987	Garcinia multiflora	8.28	13
12099232	Garcinia multiflora	7.07	11
12028064	Garcinia multiflora	7.93	15
12069786	Garcinia multiflora	10.73	25
12061580	Garcinia multiflora	6.72	8
12063736	Garcinia multiflora	10.79	15
12030003	Garcinia multiflora	13.53	15
12058360	Garcinia multiflora	5.03	11
12068726	Garcinia multiflora	11.78	16
12032493	Garcinia multiflora	3.88	3
12058982	Garcinia multiflora	11.08	16
12077652	Garcinia multiflora	10.12	17
12069041	Garcinia multiflora	4.14	7
12028071	Garcinia multiflora	11.78	17
12024015	Garcinia multiflora	7.86	13
12024212	Garcinia multiflora	3.37	5
12054246	Garcinia multiflora	2.1	4
12067909	Garcinia multiflora	7.13	12
12060369	Garcinia multiflora	7.89	13
12021718	Garcinia multiflora	18.4	20
12061045	Garcinia multiflora	9.61	10
12032512	Garcinia multiflora	3.72	4.5
12024031	Garcinia multiflora	10.6	17
12024231	Garcinia multiflora	8.5	13
12099247	Garcinia multiflora	5.28	8
12061550	Garcinia multiflora	15.28	10
12039519	Garcinia multiflora	7.61	13
12024093	Garcinia multiflora	6.94	11
12039444	Garcinia multiflora	7.8	11
12058749	Garcinia multiflora	3.98	10
12024034	Garcinia multiflora	21.07	20
12062151	Garcinia multiflora	16.49	15
12068617	Garcinia multiflora	17.35	20
12061465	Garcinia multiflora	9.74	9
12025638	Garcinia multiflora	14.16	13
12069248	Garcinia multiflora	9.93	13
12067487	Garcinia multiflora	1.75	3.2
12062286	Melastoma affine	1.18	2.2
12386773	Melastoma affine	1.15	2.5
12386362	Melastoma affine	1.1	2.5
12058148	Melastoma affine	1.53	2.2
12072098	Melastoma affine	1.62	2.5
12036273	Melastoma affine	1.59	2.8
12058074	Melastoma affine	1.34	2.5
12035657	Pterospermum heterophyllum	1.34	3
12035750	Pterospermum heterophyllum	1.66	3.8
12077623	Pterospermum heterophyllum	1.27	2.3
12035726	Pterospermum heterophyllum	1.53	4
12070321	Pterospermum heterophyllum	1.31	3
12064573	Pterospermum heterophyllum	1.27	3.5
12004782	Pterospermum heterophyllum	1.02	2.8
12072514	Pterospermum heterophyllum	1.21	3
12077844	Pterospermum heterophyllum	1.21	3
12038212	Cyclobalanopsis fleuryi	26.9	18
12020001	Cyclobalanopsis fleuryi	24.1	25
12072358	Cyclobalanopsis fleuryi	27.72	20
12072352	Cyclobalanopsis fleuryi	27.37	25
12038253	Cyclobalanopsis fleuryi	17.67	16
12067586	Cyclobalanopsis fleuryi	45.68	25
12022452	Cyclobalanopsis fleuryi	45.36	20
12072349	Cyclobalanopsis fleuryi	15.5	18
12063559	Cyclobalanopsis fleuryi	24.1	25
12020052	Cyclobalanopsis fleuryi	4.62	8
12077680	Cyclobalanopsis fleuryi	2.07	5
12072387	Cyclobalanopsis fleuryi	26.23	20
12020250	Cyclobalanopsis fleuryi	19.54	18
12069343	Cyclobalanopsis fleuryi	19.26	12
12027805	Cyclobalanopsis fleuryi	25.5	20
12078871	Cyclobalanopsis fleuryi	36.54	17
12026643	Cyclobalanopsis fleuryi	28.65	20
12031309	Cyclobalanopsis fleuryi	30.56	17
12023061	Cyclobalanopsis fleuryi	12.99	11
12070869	Cyclobalanopsis fleuryi	23.01	16
12078023	Cyclobalanopsis fleuryi	20.63	18
12064367	Cyclobalanopsis fleuryi	19.13	20
12036919	Ormosia fordiana	12.86	16
12026488	Ormosia fordiana	11.97	18
12026538	Ormosia fordiana	14.77	16
12026416	Ormosia fordiana	1.27	2.7
12078050	Ormosia fordiana	7.73	14
12069669	Ormosia fordiana	16.55	12
12079982	Ormosia fordiana	11.46	12
12024889	Ormosia fordiana	7.13	11
12032419	Ormosia fordiana	15.66	18
12385462	Ormosia fordiana	1.1	2.8
12025690	Ormosia fordiana	29.92	20
12036844	Ormosia fordiana	13.72	15
12025647	Ormosia fordiana	8.56	13
10044810	Ormosia fordiana	3.45	2.8
12065525	Ormosia fordiana	13.37	16
12021169	Ormosia fordiana	16.49	16
12035630	Ormosia fordiana	1.59	3.8
12024135	Ormosia fordiana	3.92	5
12063595	Ormosia fordiana	21.07	23
12037781	Cyclobalanopsis chungii	2.2	3.5
12060139	Cyclobalanopsis chungii	17.41	26
12078753	Cyclobalanopsis chungii	16.93	18
12057528	Cyclobalanopsis chungii	29.67	25
12057553	Cyclobalanopsis chungii	44.82	28
12069725	Cyclobalanopsis chungii	27.06	25
12037377	Cyclobalanopsis chungii	42.75	35
12099586	Cyclobalanopsis chungii	1.4	3.5
12063531	Cyclobalanopsis chungii	24.83	25
12021020	Cyclobalanopsis chungii	16.33	18
12060067	Cyclobalanopsis chungii	13.53	13
12037762	Cyclobalanopsis chungii	1.08	3
12076562	Cyclobalanopsis chungii	4.93	6
12060138	Cyclobalanopsis chungii	47.33	30
12033257	Cyclobalanopsis chungii	43.99	28
12072324	Cyclobalanopsis chungii	65.25	28
12060177	Cyclobalanopsis chungii	52.2	26
12059588	Cyclobalanopsis chungii	30.4	28
12004800	Cyclobalanopsis chungii	42.97	25
12062620	Cyclobalanopsis chungii	28.97	25
12033343	Cyclobalanopsis chungii	15.72	17
12066421	Cyclobalanopsis chungii	53.22	25
12025053	Cyclobalanopsis chungii	37.88	26
12052357	Cyclobalanopsis chungii	53.29	28
12022424	Cyclobalanopsis chungii	25.08	25
12057732	Cyclobalanopsis chungii	44.25	25
12052371	Cyclobalanopsis chungii	43.48	32
12026457	Cyclobalanopsis chungii	19.32	20
12064844	Cyclobalanopsis chungii	34.15	25
12057045	Cyclobalanopsis chungii	19.67	25
12026426	Cyclobalanopsis chungii	28.36	28
12068926	Cyclobalanopsis chungii	40.43	28
12033377	Cyclobalanopsis chungii	18.56	18
12058354	Cyclobalanopsis chungii	21.84	25
12064361	Cyclobalanopsis chungii	22.47	28
12033226	Cyclobalanopsis chungii	37.5	28
12025552	Cyclobalanopsis chungii	35.97	30
12061967	Cyclobalanopsis chungii	23.55	26
12026425	Cyclobalanopsis chungii	30.72	25
12035988	Cyclobalanopsis chungii	36.26	26
12058144	Cyclobalanopsis chungii	28.65	18
12026356	Cyclobalanopsis chungii	38.1	28
12026343	Cyclobalanopsis chungii	40.62	35
12065970	Cyclobalanopsis chungii	41.67	25
12037026	Cyclobalanopsis chungii	43.07	25
12039587	Cyclobalanopsis chungii	26.58	28
12020437	Cyclobalanopsis chungii	64.94	35
12033363	Cyclobalanopsis chungii	34.06	28
12059528	Cyclobalanopsis chungii	1	2.6
12033330	Cyclobalanopsis chungii	36.8	23
12029188	Cyclobalanopsis chungii	36.51	28
12056593	Cyclobalanopsis chungii	26.29	22
12069093	Cyclobalanopsis chungii	74.48	25
12079208	Cyclobalanopsis chungii	1.72	2.5
12057743	Cyclobalanopsis chungii	40.43	28
12057771	Cyclobalanopsis chungii	47.27	35
12069623	Cyclobalanopsis chungii	26.17	17
12064708	Cyclobalanopsis chungii	36.76	25
12069780	Cyclobalanopsis chungii	30.24	25
12052233	Cyclobalanopsis chungii	42.43	30
12025969	Cyclobalanopsis chungii	43.77	25
12025844	Cyclobalanopsis chungii	22.85	26
12035499	Cyclobalanopsis chungii	33.42	25
12035502	Cyclobalanopsis chungii	27.25	17
12033136	Cyclobalanopsis chungii	29.28	18
12028052	Cyclobalanopsis chungii	35.59	25
12028081	Cyclobalanopsis chungii	33.42	25
12036381	Cyclobalanopsis chungii	41.38	25
12036362	Cyclobalanopsis chungii	9.39	15
12069586	Cyclobalanopsis chungii	23.71	25
12039422	Cyclobalanopsis chungii	36.67	25
12070566	Cyclobalanopsis chungii	29.54	20
12052278	Cyclobalanopsis chungii	12.25	26
12064945	Cyclobalanopsis chungii	26.01	22
12068977	Cyclobalanopsis chungii	16.71	18
12067880	Cyclobalanopsis chungii	21.55	18
12026667	Cyclobalanopsis chungii	8.4	12
12026634	Cyclobalanopsis chungii	30.88	28
12029045	Cyclobalanopsis chungii	35.01	27
12069057	Cyclobalanopsis chungii	17.44	17
12063003	Cyclobalanopsis chungii	35.56	35
12058944	Cyclobalanopsis chungii	31.64	23
12058926	Cyclobalanopsis chungii	32.37	26
12026299	Cyclobalanopsis chungii	38.2	30
12068670	Cyclobalanopsis chungii	47.27	30
12025888	Cyclobalanopsis chungii	43.61	28
12062792	Cyclobalanopsis chungii	31.42	28
12072629	Cyclobalanopsis chungii	13.21	13
12025454	Cyclobalanopsis chungii	35.62	28
12038008	Cyclobalanopsis chungii	47.43	28
12057034	Cyclobalanopsis chungii	92.63	35
12033362	Cyclobalanopsis chungii	41.51	25
12032887	Cyclobalanopsis chungii	44.15	28
12060399	Cyclobalanopsis chungii	34.76	28
12063059	Cyclobalanopsis chungii	35.81	35
12069716	Cyclobalanopsis chungii	33.58	26
12050376	Cyclobalanopsis chungii	1.31	2.5
12032939	Cyclobalanopsis chungii	33.26	26
12059521	Cyclobalanopsis chungii	31.04	28
12059028	Cyclobalanopsis chungii	41.06	26
12063580	Cyclobalanopsis chungii	20.05	23
12026234	Cyclobalanopsis chungii	37.72	30
12065953	Cyclobalanopsis chungii	46.09	30
12020059	Cyclobalanopsis chungii	28.71	23
12050322	Cyclobalanopsis chungii	28.11	25
12057450	Cyclobalanopsis chungii	16.23	18
12001084	Cyclobalanopsis chungii	36.16	28
12062699	Cyclobalanopsis chungii	45.2	32
12029770	Cyclobalanopsis chungii	47.91	35
12055089	Cyclobalanopsis chungii	32.31	26
12027936	Cyclobalanopsis chungii	36.76	26
12067406	Cyclobalanopsis chungii	41.86	28
12028181	Cyclobalanopsis chungii	34	25
12060368	Cyclobalanopsis chungii	33.58	30
12062099	Cyclobalanopsis chungii	1.66	2.8
12061999	Cyclobalanopsis chungii	50.9	28
12072053	Canarium album	4.65	4.5
12077298	Canarium album	3.28	4.5
12037637	Canarium album	6.05	12
12070796	Canarium album	28.97	12
12037638	Canarium album	2.2	5
12386420	Canarium album	1.26	2.8
12072176	Canarium album	7.03	7.5
12072181	Canarium album	3.76	6
12004763	Canarium album	1.11	3
12037625	Canarium album	4.46	7
12032925	Canarium album	1.59	3
12037609	Canarium album	5.41	6
12038413	Canarium album	4.42	7
12021448	Canarium album	31.19	25
12072174	Canarium album	3.92	5
12037624	Canarium album	5.73	7
12036296	Canarium album	4.46	7.5
12038441	Canarium album	5.44	7
12070806	Canarium album	8.09	5
12024351	Canarium album	3.28	4.5
12072171	Canarium album	3.57	6
12025269	Canarium album	25.21	25
12070655	Canarium album	13.4	5
12004719	Canarium album	6.62	7
12078069	Canarium album	17.44	25
12070729	Canarium album	3.6	7.5
12038417	Canarium album	3.44	3.5
12038450	Canarium album	19.99	13
12074302	Canarium album	16.01	15
12070913	Canarium album	4.84	8
12079857	Canarium album	2.96	5
12099415	Canarium album	1.75	4.5
12037608	Canarium album	3.34	7
12037632	Canarium album	1.59	3.5
12038405	Canarium album	6.11	8
12072236	Canarium album	5.03	8
12071992	Canarium album	5.79	7
12037640	Canarium album	2.23	3.8
12386423	Canarium album	1.15	2.8
12072120	Canarium album	6.4	9
12027937	Canarium album	2.96	7
12079846	Canarium album	3.63	5
12074246	Canarium album	19.99	12
12099448	Canarium album	16.36	15
12072119	Canarium album	14.42	15
12037739	Canarium album	11.24	12
12037757	Canarium album	1.46	3.5
12070879	Canarium album	6.18	7
12070890	Canarium album	2.2	4
12072235	Canarium album	2.36	4
12070340	Canarium album	7.16	8
12026249	Canarium album	3.09	5
12072037	Canarium album	2.55	5
12072011	Canarium album	2.86	6
12027977	Canarium album	2.1	4
12026221	Canarium album	3.88	6
12070889	Canarium album	3.12	5
12055330	Canarium album	3.09	5
12070746	Canarium album	31.35	20
12070292	Canarium album	4.65	7.5
12038475	Callicarpa peichieniana	1.53	2
12386805	Callicarpa peichieniana	1.3	2.2
12035488	Callicarpa peichieniana	1.62	2.5
12038469	Callicarpa peichieniana	1.15	2.8
12078502	Callicarpa peichieniana	2.01	3.5
12078650	Callicarpa peichieniana	1.21	3.3
12029707	Callicarpa peichieniana	1.69	2.5
12076751	Callicarpa peichieniana	1.62	2.5
12038545	Callicarpa peichieniana	2.39	3
12077915	Callicarpa peichieniana	1.37	3
12387557	Callicarpa peichieniana	1	2.7
12078657	Callicarpa peichieniana	2.04	3.5
12078490	Callicarpa peichieniana	1.24	3.2
12058783	Callicarpa peichieniana	1.4	3
12022466	Callicarpa peichieniana	1.27	3.5
12023159	Callicarpa peichieniana	1.66	2.8
12023134	Callicarpa peichieniana	1.15	3
12021499	Callicarpa peichieniana	1.85	3.5
12075798	Callicarpa peichieniana	1.15	2.5
12077306	Callicarpa peichieniana	2.29	3.5
12058348	Callicarpa peichieniana	1.21	3.8
12061880	Callicarpa peichieniana	1.91	3
12078590	Callicarpa peichieniana	1.15	3
12386896	Callicarpa peichieniana	1	2.2
12386902	Callicarpa peichieniana	1	3
12071899	Callicarpa peichieniana	1.4	2.2
12024983	Callicarpa peichieniana	1.69	4
12021712	Callicarpa peichieniana	2.07	5
12076752	Callicarpa peichieniana	2.42	4.6
12387030	Callicarpa peichieniana	1.1	2.6
12031246	Callicarpa peichieniana	1.66	3
12061593	Callicarpa peichieniana	1.72	3.8
12058688	Callicarpa peichieniana	1	2.5
12060077	Callicarpa peichieniana	1.24	3.6
12021638	Callicarpa peichieniana	1.81	1.6
12039144	Callicarpa peichieniana	1.43	2.5
12068798	Callicarpa peichieniana	1.59	3.5
12021642	Callicarpa peichieniana	1.53	2.5
12028194	Callicarpa peichieniana	1.81	2.5
12058090	Callicarpa peichieniana	1.24	3
12381754	Callicarpa peichieniana	1.6	3.5
12059056	Callicarpa peichieniana	1.34	2.6
12025287	Callicarpa peichieniana	1.08	2.5
12038382	Callicarpa peichieniana	1.59	3.8
12058324	Callicarpa peichieniana	1.34	3
12077268	Callicarpa peichieniana	1.97	2.8
12070504	Callicarpa peichieniana	1.18	2.5
12060244	Callicarpa peichieniana	1.11	2.5
12069800	Callicarpa peichieniana	1.11	3
12058054	Callicarpa peichieniana	1.4	3
12335355	Callicarpa peichieniana	3.35	2.8
12099237	Callicarpa peichieniana	1.21	2.8
12063165	Callicarpa peichieniana	1.69	3.5
12055312	Callicarpa peichieniana	1.15	3.2
12070468	Callicarpa peichieniana	1.31	3.8
12099240	Callicarpa peichieniana	1.11	2.5
12077312	Callicarpa peichieniana	2.9	3.8
12058050	Callicarpa peichieniana	1.37	2.5
12078783	Callicarpa peichieniana	1.75	2.5
12036292	Callicarpa peichieniana	1.56	3
12021063	Callicarpa peichieniana	1.72	2.8
12069290	Callicarpa peichieniana	1.34	2.8
12099294	Callicarpa peichieniana	1.43	2.6
12071912	Callicarpa peichieniana	1.11	2.5
12077867	Diplospora dubia	1.11	2.5
12022417	Diplospora dubia	2.29	4.5
12077846	Diplospora dubia	1.11	2.4
12077590	Diplospora dubia	1.72	3
12025289	Diplospora dubia	3.41	5
12022981	Diplospora dubia	2.26	2.5
12077971	Diplospora dubia	1.53	3.8
12036992	Diplospora dubia	1.81	4
12035955	Diplospora dubia	1.37	3
12067243	Diplospora dubia	1.11	2.8
12056010	Diplospora dubia	1.27	3.5
12059564	Diplospora dubia	1.11	2.3
12060838	Diplospora dubia	1	2.8
12036969	Diplospora dubia	1.91	2.8
12062051	Diplospora dubia	1.27	3
12020358	Diplospora dubia	1.4	3.8
12061939	Diplospora dubia	1.11	2.5
12077516	Diplospora dubia	1.27	3.9
12061923	Diplospora dubia	1.02	2.5
12069753	Diplospora dubia	1.53	1.6
12059469	Diplospora dubia	1.11	2.3
12024763	Diplospora dubia	1.43	2.3
12026561	Diplospora dubia	1.56	2.2
12053123	Diplospora dubia	1.02	2.4
12029898	Diplospora dubia	1.15	1.7
12021528	Diplospora dubia	1.08	2.2
12079775	Diplospora dubia	1.02	3
12070780	Diplospora dubia	1.78	3.5
12077364	Diplospora dubia	1.66	3
12079443	Diplospora dubia	1.18	1.7
12038373	Diplospora dubia	1.43	2.3
12058817	Diplospora dubia	1.75	3.8
12062684	Diplospora dubia	1.27	2.5
12021508	Diplospora dubia	1.69	3.5
12060295	Diplospora dubia	1.05	2.8
12060310	Ilex memecylifolia	1.66	3.5
12079210	Ilex memecylifolia	2.83	2.3
12033034	Ilex memecylifolia	1.66	4
12025998	Ilex memecylifolia	10.03	8
12036849	Ilex memecylifolia	11.05	15
12036830	Ilex memecylifolia	7.99	10
12079787	Ilex memecylifolia	6.05	8
12024815	Ilex memecylifolia	6.27	7.5
[truncated: 22,399 more rows]
