# Supplementary material for: Comparing shade tolerance measures of woody forest species
Source: PeerJ. 2018 Oct 9;6:e5736. doi: 10.7717/peerj.5736 (PMC6183557; doi:10.7717/peerj.5736)
Supplement: Supplemental Information 7 — Raw data. Mortality is the annual mortality of each species. n0 is stem number of each species in the first census (in August 2012). n1 is stem number of each species in the second census (in December 2014). [file peerj-06-5736-s007.csv]

Species	n0	n1	Mortality
Altingia chinensis	21	20	0.020692971
Glochidion wrightii	2	1	0.257002855
Artocarpus hypargyreus	1	1	0
Tarenna mollissima	13	12	0.033722305
Symplocos anomala	15	14	0.029135506
Ficus variolosa	6	5	0.075163034
Camellia sinensis	6	6	0
Litsea rotundifolia Hemsl. var. oblongifolia	24	19	0.095271744
Lindera chunii	79	72	0.038983403
Enkianthus serrulatus	3	1	0.375518665
Alniphyllum fortunei	1	1	0
Lasianthus chinensis	3	3	0
Ficus hirta	7	5	0.134287479
Zanthoxylum myriacanthum	2	2	0
Buxus megistophylla	1	1	0
Elaeocarpus decipiens	17	17	0
Heteropanax brevipedicellatus	17	17	0
Machilus breviflora	170	165	0.01271263
Ficus hispida	1	1	0
Meliosma fordii	3	3	0
Garcinia multiflora	16	15	0.027280348
Melastoma affine	5	5	0
Pterospermum heterophyllum	7	7	0
Cyclobalanopsis fleuryi	1	1	0
Ormosia fordiana	4	4	0
Cyclobalanopsis chungii	7	7	0
Canarium album	8	8	0
Callicarpa peichieniana	41	40	0.01052675
Diplospora dubia	20	20	0
Ilex memecylifolia	32	31	0.013514434
Pittosporum glabratum	16	16	0
Ormosia glaberrima	127	123	0.013621828
Symplocos lancifolia	20	19	0.021742979
Randia canthioides	141	137	0.012258092
Syzygium kwangtungense	35	34	0.01234638
Beilschmiedia fordii	21	21	0
Camellia semiserrata	11	11	0
Madhuca hainanensis	23	23	0
Castanopsis nigrescens	1	1	0
Calophyllum membranaceum	1	1	0
Illicium dunnianum	12	12	0
Syzygium hancei	44	41	0.029811282
Craibiodendron stellatum	7	7	0
Castanopsis hystrix	10	10	0
Sloanea sinensis	8	8	0
Ternstroemia gymnanthera	99	97	0.008708519
Cyclobalanopsis hui	71	70	0.006060689
Daphniphyllum oldhami	2	1	0.257002855
Elaeocarpus chinensis	5	5	0
Litsea greenmaniana	30	26	0.059486177
Schoepfia chinensis	11	11	0
Machilus chinensis	3	3	0
Cryptocarya concinna	1600	1556	0.011879674
Ilex dasyphylla	2	2	0
Symplocos laurina	7	7	0
Engelhardtia roxburghiana	1	1	0
Cinnamomum porrectum	6	5	0.075163034
Xanthophyllum hainanense	312	304	0.011070616
Gardenia jasminoides	107	105	0.008053886
Litsea acutivena	123	120	0.01052675
Mytilaria laosensis	2	2	0
Corylopsis sinensis	11	11	0
Symplocos stellaris	2	2	0
Castanopsis fissa	10	10	0
Reevesia thyrsoidess	50	49	0.008620928
Pithecellobium lucidum	14	10	0.134287479
Maesa insignis	3	3	0
Castanopsis fabri	3	3	0
Diospyros morrisiana	20	16	0.091202472
Ardisia quinquegona	1694	1668	0.006606917
Cinnamomum appelianum	7	7	0
Glochidion eriocarpum	3	3	0
Diospyros strigosa	5	4	0.091202472
Manglietia moto	2	2	0
Ilex pubilimba	14	13	0.03126149
Casearia villilimba	26	25	0.016668396
Hartia villosa	8	8	0
Castanopsis fordii	1	1	0
Ardisia elegans	22	22	0
Castanopsis carlesii	31	30	0.013954502
symplocos congesta	8	8	0
Rapanea neriifolia	281	280	0.001526719
Rehderodendron macrocarpum	11	11	0
Schima superba	5	5	0
Machilus litseifolia	1	1	0
Manglietia fordiana	15	15	0
Ilex subficoidea	12	12	0
Ormosia pachycarpa	8	7	0.055621028
Machilus velutina	51	43	0.070515569
Turpinia arguta	26	23	0.051187288
Evodia lepta	24	20	0.075163034
Ilex triflora	7	7	0
Lindera metcalfiana	1	1	0
Fortunella hindsii	1	1	0
Vitex quinata	17	15	0.052228033
Engelhardtia fenzlii	51	51	0
Tutcheria championi	49	48	0.008797907
Euonymus laxiflorus	48	46	0.018074496
Itea chinensis	63	60	0.020692971
Saurauia tristyla	1	1	0
Adina pilulifera	2	2	0
Microtropis gracilipes	59	56	0.022117073
Photinia prunifolia	9	9	0
Homalium cochinchinense	6	5	0.075163034
Ficus erecta Thunb. Var. beecheyana	1	1	0
Lithocarpus litseifolius	8	7	0.055621028
Ilex rotunda	2	2	0
Sinosideroxylon wightianum	255	244	0.018720547
Eurya hebeclados	39	38	0.011070616
Camellia caudata	248	238	0.017484514
Distylium racemosum	562	537	0.019312683
Pentaphylax euryoides	1	1	0
Eurya nitida	2	2	0
Wikstroemia nutans	16	13	0.085143722
Neolitsea phanerophlebia	370	357	0.015211922
Symplocos adenophylla	6	5	0.075163034
Laurocerasus phaeosticta	73	69	0.023861951
Dendrobenthamia hongkongensis	3	3	0
Eriobotrya fragrans	11	11	0
Antidesma venosum	221	214	0.013699589
Artocarpus styracifolius	143	139	0.01208525
Lithocarpus calophyllus	40	39	0.010791835
Neolitsea aurata	3	2	0.159510451
Schefflera octophylla	13	12	0.033722305
Myrica rubra	1	1	0
Olea dioica	39	39	0
Cinnamomum burmanni	7	7	0
Rhododendron simsii	145	128	0.052041305
Lithocarpus lohangwu	21	18	0.063929586
Meliosma rigida Sieb. et Zucc. var. pannosa	1	1	0
Ixonanthes chinensis	10	9	0.044150215
Meliosma squamulata	15	15	0
Litsea elongata	211	201	0.020593522
Carallia brachiata	4	4	0
Cyclobalanopsis bambusaefolia	55	52	0.023751723
Syzygium championii	27	27	0
Lithocarpus uvariifolius	91	88	0.014264157
