# Supplementary material for: Comparing shade tolerance measures of woody forest species
Source: PeerJ. 2018 Oct 9;6:e5736. doi: 10.7717/peerj.5736 (PMC6183557; doi:10.7717/peerj.5736)
Supplement: Supplemental Information 9 — Raw data. [file peerj-06-5736-s009.csv]

Species	Tag	LCP	Rd
Altingia chinensis	12060248	4.019778952	0.17341267
Altingia chinensis	12067895	0.692712851	0.029895012
Altingia chinensis	12064382	3.785570848	0.174041777
Altingia chinensis	12072391	1.719099801	0.110112339
Altingia chinensis	12063414	4.404503617	0.303185443
Altingia chinensis	12050217	0.914159318	0.033187926
Glochidion wrightii	12055231	2.880868113	0.127823686
Glochidion wrightii	12077720	0.125651013	0.00554921
Glochidion wrightii	12075749	0.205955328	0.022900793
Glochidion wrightii	12077720	1.665715337	0.096907111
Glochidion wrightii	12075749	4.208494354	0.090008128
Glochidion wrightii	12074245	4.344337027	0.24009939
Artocarpus hypargyreus	12037125	5.313738062	0.320762229
Artocarpus hypargyreus	12037125	1.158258324	0.090946448
Artocarpus hypargyreus	12037125	1.423000611	0.111527643
Artocarpus hypargyreus	12037125	3.203140448	0.239776688
Artocarpus hypargyreus	12037125	3.09207188	0.240866783
Artocarpus hypargyreus	12037125	2.636045913	0.227400223
Tarenna mollissima	12058220	5.126894763	0.200859316
Tarenna mollissima	12078170	0.76291701	0.047840747
Tarenna mollissima	12025607	1.062651734	0.06440522
Tarenna mollissima	12037140	2.440733318	0.145131239
Tarenna mollissima	12058159	1.923517494	0.132803674
Tarenna mollissima	12030035	2.698393992	0.208907901
Symplocos anomala	12071860	4.051560598	0.13382271
Symplocos anomala	12038383	5.761643708	0.22678738
Symplocos anomala	12079387	3.907667858	0.167352741
Symplocos anomala	12022416	4.118357332	0.155430753
Symplocos anomala	12077948	18.9594946	0.549401984
Symplocos anomala	12077719	12.50766741	0.538533259
Ficus variolosa	12060833	1.051710601	0.055191267
Ficus variolosa	12025509	7.832349988	0.609153793
Ficus variolosa	12076434	0.411631517	0.033679696
Ficus variolosa	12022957	1.278009877	0.072561748
Ficus variolosa	12079270	1.321196079	0.093112971
Ficus variolosa	12026573	4.808171041	0.373057661
Camellia sinensis	12029800	1.678942641	0.112918853
Camellia sinensis	12077241	8.590224933	0.56409424
Camellia sinensis	12060816	5.283834696	0.287630705
Camellia sinensis	12060214	2.413962169	0.120554756
Camellia sinensis	12052332	1.229228973	0.073737291
Camellia sinensis	12020112	2.770625174	0.165502909
Litsea rotundifolia Hemsl. var. oblongifolia	12078006	1.701016322	0.10136556
Litsea rotundifolia Hemsl. var. oblongifolia	12037194	0.67263972	0.033194189
Litsea rotundifolia Hemsl. var. oblongifolia	12079279	7.041798592	0.377995031
Litsea rotundifolia Hemsl. var. oblongifolia	12069213	2.985770476	0.183960555
Litsea rotundifolia Hemsl. var. oblongifolia	12099558	2.668747964	0.145538906
Litsea rotundifolia Hemsl. var. oblongifolia	12061853	2.161372964	0.071661341
Lindera chunii	12039631	6.154738248	0.403216077
Lindera chunii	12060209	7.921928663	0.562254637
Lindera chunii	12001142	1.453550268	0.104066342
Lindera chunii	12070914	0.395628406	0.024055927
Lindera chunii	12026428	0.522627415	0.03069793
Lindera chunii	12036305	14.89726127	0.603269538
Enkianthus serrulatus	12065492	5.883344489	0.518180709
Enkianthus serrulatus	12020176	1.349867296	0.088180912
Enkianthus serrulatus	12050347	5.122935845	0.408787016
Enkianthus serrulatus	12060066	2.140702062	0.154181174
Enkianthus serrulatus	12033045	2.190374857	0.220158206
Enkianthus serrulatus	12079259	1.046955507	0.054745046
Alniphyllum fortunei	12058968	5.557394988	0.352008457
Alniphyllum fortunei	12058968	8.576297708	0.636787824
Alniphyllum fortunei	12058968	4.586338944	0.287084092
Alniphyllum fortunei	12058968	5.052777955	0.331619027
Alniphyllum fortunei	12058968	12.8298992	0.891728901
Alniphyllum fortunei	12058968	3.670682001	0.228016847
Lasianthus chinensis	12077942	0.240986084	0.008050167
Lasianthus chinensis	12038073	1.45752379	0.084629814
Lasianthus chinensis	12078850	0.30303282	0.015283912
Lasianthus chinensis	12077267	4.432221401	0.198744794
Lasianthus chinensis	12078850	0.526909907	0.029120691
Lasianthus chinensis	12077356	3.284596252	0.254511836
Ficus hirta	12077405	3.759796642	0.2829674
Ficus hirta	12077349	0.440379278	0.021010485
Ficus hirta	12077963	6.460174876	0.287452385
Ficus hirta	12077337	2.929948954	0.231404574
Ficus hirta	12078909	6.128001746	0.29385723
Ficus hirta	12001026	0.972283508	0.030508604
Zanthoxylum myriacanthum	12058967	11.87457201	0.7501151
Zanthoxylum myriacanthum	12066696	6.113248801	0.431696186
Zanthoxylum myriacanthum	12053195	11.83248692	0.869714107
Zanthoxylum myriacanthum	12066696	3.314637721	0.214985875
Zanthoxylum myriacanthum	12058967	15.90859575	1.094708145
Zanthoxylum myriacanthum	12053195	9.616530238	0.61182697
Buxus megistophylla	12056380	6.497820076	0.180036542
Buxus megistophylla	12056381	2.096709887	0.080233604
Buxus megistophylla	12056380	10.3055861	0.297091755
Buxus megistophylla	12056381	3.486316464	0.15593092
Buxus megistophylla	12056381	6.804732852	0.233528301
Buxus megistophylla	12056380	0.707807242	0.024543022
Elaeocarpus decipiens	12025244	3.771920486	0.186522625
Elaeocarpus decipiens	12024116	2.823682532	0.139995968
Elaeocarpus decipiens	12069262	2.375123862	0.123134709
Elaeocarpus decipiens	12022605	0.242023616	0.012359484
Elaeocarpus decipiens	12068839	2.429809341	0.168039431
Elaeocarpus decipiens	12022603	7.701362128	0.357068895
Heteropanax brevipedicellatus	12067937	1.293012725	0.087940504
Heteropanax brevipedicellatus	12056349	3.572685421	0.113522473
Heteropanax brevipedicellatus	12058278	8.580146924	0.637204138
Heteropanax brevipedicellatus	12387389	1.852360002	0.140930825
Heteropanax brevipedicellatus	12035689	1.12801717	0.087343801
Heteropanax brevipedicellatus	12023033	0.17887248	0.01647986
Machilus breviflora	12079307	3.661820323	0.161661991
Machilus breviflora	12072718	16.60977837	0.581455905
Machilus breviflora	12021553	1.287136089	0.09117637
Machilus breviflora	12026381	2.574130129	0.127483716
Machilus breviflora	12069618	5.158189079	0.439636589
Machilus breviflora	12004741	7.764121936	0.371310124
Ficus hispida	12048530	4.927116387	0.140105777
Ficus hispida	12032107	2.294165513	0.123586841
Ficus hispida	12075735	3.127155863	0.160719341
Ficus hispida	12048525	4.969303939	0.236174335
Ficus hispida	12032108	9.742187794	0.582843323
Ficus hispida	12048435	1.168168767	0.03856895
Meliosma fordii	12070295	2.688637554	0.166728643
Meliosma fordii	12070260	1.771024214	0.108256425
Meliosma fordii	12079190	1.966630174	0.110018762
Meliosma fordii	12054366	2.360854844	0.096884874
Meliosma fordii	12078794	4.19788153	0.212212125
Meliosma fordii	12057708	4.000675553	0.164157754
Garcinia multiflora	12069024	8.421096912	0.492007548
Garcinia multiflora	12065848	3.737316654	0.267898527
Garcinia multiflora	12033261	2.425606357	0.150807318
Garcinia multiflora	12072427	3.556592551	0.306136339
Garcinia multiflora	12072723	1.181650192	0.076317646
Garcinia multiflora	12022614	4.805979118	0.408343177
Melastoma affine	12072098	6.735309873	0.507244411
Melastoma affine	12072098	1.344282783	0.137982977
Melastoma affine	12072098	4.502567541	0.310070389
Melastoma affine	12072098	7.888673614	0.709648763
Melastoma affine	12072098	8.046692462	0.669802103
Melastoma affine	12072098	5.814637243	0.382938314
Pterospermum heterophyllum	12035657	2.593410733	0.195844167
Pterospermum heterophyllum	12077844	1.029254789	0.072504433
Pterospermum heterophyllum	12004782	0.3919908	0.016974409
Pterospermum heterophyllum	12035750	1.519646416	0.104072679
Pterospermum heterophyllum	12035726	2.097788488	0.137451911
Pterospermum heterophyllum	12072514	0.786670195	0.065374088
Cyclobalanopsis fleuryi	12077680	2.138792588	0.130020594
Cyclobalanopsis fleuryi	12077680	0.112844515	0.007312884
Cyclobalanopsis fleuryi	12077680	3.456641882	0.23724966
Cyclobalanopsis fleuryi	12077680	0.545258419	0.035853365
Cyclobalanopsis fleuryi	12077680	1.897280135	0.137029187
Cyclobalanopsis fleuryi	12077680	1.562071135	0.09163217
Ormosia fordiana	12026416	0.158490792	0.007589661
Ormosia fordiana	12036919	0.593536081	0.049209718
Ormosia fordiana	12035630	0.531092567	0.032835364
Ormosia fordiana	12036919	0.55546467	0.038327238
Ormosia fordiana	12024135	3.872173811	0.226064136
Ormosia fordiana	12026416	2.677494143	0.126949744
Cyclobalanopsis chungii	12050376	1.941342638	0.094492608
Cyclobalanopsis chungii	12062099	3.408096799	0.180365478
Cyclobalanopsis chungii	12076562	0.292805684	0.007523209
Cyclobalanopsis chungii	12079208	12.15771044	0.650942237
Cyclobalanopsis chungii	12072629	1.893567635	0.105363302
Cyclobalanopsis chungii	12037762	19.84236374	0.879036413
Canarium album	12027977	10.36630488	0.57007293
Canarium album	12099415	4.414866403	0.262586585
Canarium album	12077298	2.308333492	0.15104453
Canarium album	12024351	1.413944766	0.062439634
Canarium album	12079846	9.789616847	0.688466282
Canarium album	12072037	5.256548744	0.348472752
Callicarpa peichieniana	12063165	5.888272164	0.220377118
Callicarpa peichieniana	12058688	2.31543307	0.093200863
Callicarpa peichieniana	12024983	0.932340776	0.048279188
Callicarpa peichieniana	12055312	1.109241363	0.047503005
Callicarpa peichieniana	12077312	1.831142382	0.047466179
Callicarpa peichieniana	12028194	1.513999467	0.094780342
Diplospora dubia	12060838	1.1633473	0.059802199
Diplospora dubia	12021528	0.615401697	0.028998253
Diplospora dubia	12026561	8.037958103	0.063086694
Diplospora dubia	12060295	2.508620809	0.169612639
Diplospora dubia	12056010	2.471724124	0.149489544
Diplospora dubia	12058817	3.001470984	0.154969094
Ilex memecylifolia	12059148	4.291451107	0.220065409
Ilex memecylifolia	12065961	0.109549784	0.005725091
Ilex memecylifolia	12054285	11.36361883	0.473953042
Ilex memecylifolia	12077868	0.076128989	0.005577004
Ilex memecylifolia	12058654	0.14786142	0.009850976
Ilex memecylifolia	12059058	0.149931171	0.005220493
Pittosporum glabratum	12079806	1.027296868	0.053695223
Pittosporum glabratum	10018952	0.212482026	0.010064013
Pittosporum glabratum	12055293	2.162045345	0.079797289
Pittosporum glabratum	12066673	14.61728093	0.961993177
Pittosporum glabratum	12024900	2.260336427	0.155090408
Pittosporum glabratum	12022708	1.550173656	0.101992633
Ormosia glaberrima	12027016	1.043074936	0.068428596
Ormosia glaberrima	12062086	2.788300613	0.140974351
Ormosia glaberrima	12065964	0.609512298	0.070148521
Ormosia glaberrima	12020288	4.291682644	0.225415449
Ormosia glaberrima	12065575	1.027530438	0.054410271
Ormosia glaberrima	12064931	0.948232092	0.041555932
Symplocos lancifolia	12022570	0.72925115	0.068377988
Symplocos lancifolia	12025073	2.331143965	0.162371845
Symplocos lancifolia	12054252	0.87709808	0.042101508
Symplocos lancifolia	12077227	1.575006112	0.14740874
Symplocos lancifolia	12020391	1.586209342	0.115260139
Symplocos lancifolia	12072651	3.154624429	0.219838187
Randia canthioides	12021402	1.462182757	0.188184761
Randia canthioides	12032901	8.926343964	0.451302612
Randia canthioides	12078803	2.426248863	0.198171708
Randia canthioides	12067444	2.248708714	0.125057388
Randia canthioides	12056267	1.454139434	0.075854355
Randia canthioides	12032185	4.588650707	0.253474794
Syzygium kwangtungense	12028007	3.477258424	0.203688367
Syzygium kwangtungense	12020116	2.463368797	0.227706859
Syzygium kwangtungense	12057146	3.076370625	0.130767406
Syzygium kwangtungense	12020385	0.480326904	0.045096714
Syzygium kwangtungense	12055348	10.45833073	0.339536547
Syzygium kwangtungense	12077910	2.075964009	0.093681863
Beilschmiedia fordii	12035974	2.214917874	0.195332935
Beilschmiedia fordii	12027875	3.275883022	0.189670179
Beilschmiedia fordii	12077475	1.440906944	0.149500273
Beilschmiedia fordii	12074326	2.14097858	0.106547401
Beilschmiedia fordii	12067851	4.658921839	0.214911275
Beilschmiedia fordii	12060260	0.96670585	0.039184603
Camellia semiserrata	12030317	1.124094871	0.050668117
Camellia semiserrata	12057761	4.451479254	0.097977217
Camellia semiserrata	12068928	2.699036547	0.142143037
Camellia semiserrata	12038127	0.643388253	0.048627368
Camellia semiserrata	12063623	0.728042637	0.047583362
Camellia semiserrata	12064697	0.672634124	0.07281362
Madhuca hainanensis	12066779	0.367569556	0.011601055
Madhuca hainanensis	12066777	1.601273409	0.054872681
Madhuca hainanensis	12038077	0.561155572	0.044329457
Madhuca hainanensis	12032888	8.603342626	0.387812977
Madhuca hainanensis	12072128	2.835515757	0.12289479
Madhuca hainanensis	12056316	1.761874115	0.072437389
Castanopsis nigrescens	12030149	1.476400678	0.065087256
Castanopsis nigrescens	12030182	0.13129843	0.018865651
Castanopsis nigrescens	12025561	2.9754515	0.197155909
Castanopsis nigrescens	12028099	0.878489123	0.054332553
Castanopsis nigrescens	12061167	0.162294193	0.009109606
Castanopsis nigrescens	12029687	2.518473201	0.165251654
Calophyllum membranaceum	12035872	2.964808281	0.14194694
Calophyllum membranaceum	12035872	3.13783177	0.138244688
Calophyllum membranaceum	12035872	0.527506179	0.009276263
Calophyllum membranaceum	12035872	0.268751139	0.018614339
Calophyllum membranaceum	12035872	2.263207071	0.123383664
Calophyllum membranaceum	12035872	0.607809824	0.052314068
Illicium dunnianum	12035670	1.736384796	0.111279429
Illicium dunnianum	12096536	4.573757599	0.204862738
Illicium dunnianum	12025194	0.306383224	0.030786772
Illicium dunnianum	12023045	0.632158839	0.046452393
Illicium dunnianum	12072785	5.720385149	0.197952758
Illicium dunnianum	12078616	4.630547326	0.251076145
Syzygium hancei	12070604	5.666869089	0.061365919
Syzygium hancei	12077425	2.678141142	0.160886685
Syzygium hancei	12069712	2.911122787	0.105281597
Syzygium hancei	12067517	3.740412658	0.202520319
Syzygium hancei	12065515	0.689697484	0.017778179
Syzygium hancei	12022628	0.448201577	0.033443867
Craibiodendron stellatum	12072783	0.802302567	0.055732181
Craibiodendron stellatum	12022508	1.68987243	0.066784067
Craibiodendron stellatum	12072722	3.849584596	0.206283004
Craibiodendron stellatum	12024007	6.478643482	0.387816394
Craibiodendron stellatum	12077901	0.95177283	0.03339369
Craibiodendron stellatum	12063654	0.232453449	0.015422015
Castanopsis hystrix	12021775	4.592552755	0.279914116
Castanopsis hystrix	12070816	2.201616819	0.115929937
Castanopsis hystrix	12078702	2.636643597	0.227624217
Castanopsis hystrix	12030180	4.012547829	0.252537757
Castanopsis hystrix	12039583	1.845341692	0.137397288
Castanopsis hystrix	12021674	4.09657861	0.161828836
Sloanea sinensis	12061850	0.68708424	0.027282032
Sloanea sinensis	12070289	7.0904714	0.280883346
Sloanea sinensis	12070315	5.963139059	0.303671804
Sloanea sinensis	12069191	0.539583214	0.020686003
Sloanea sinensis	12071890	6.299040189	0.3930973
Sloanea sinensis	12053139	0.859792702	0.055133886
Ternstroemia gymnanthera	12024977	0.873704916	0.049393153
Ternstroemia gymnanthera	12037081	6.075817902	0.368979874
Ternstroemia gymnanthera	12024823	1.076560965	0.084532357
Ternstroemia gymnanthera	12032866	4.764197723	0.228346041
Ternstroemia gymnanthera	12029434	1.667696987	0.16962469
Ternstroemia gymnanthera	12063133	1.959109045	0.075396194
Cyclobalanopsis hui	12035693	5.422967034	0.183829355
Cyclobalanopsis hui	12001139	3.079477478	0.206510657
Cyclobalanopsis hui	12079660	2.075076979	0.142742709
Cyclobalanopsis hui	12387515	9.170599788	0.579965689
Cyclobalanopsis hui	12035623	1.390482651	0.069753238
Cyclobalanopsis hui	12022748	4.090569485	0.297923513
Daphniphyllum oldhami	12063195	6.979868449	0.388645411
Daphniphyllum oldhami	12063195	3.616514598	0.174394851
Daphniphyllum oldhami	12063195	0.398027262	0.019234024
Daphniphyllum oldhami	12062306	2.723648657	0.15235424
Daphniphyllum oldhami	12062306	4.476226787	0.201393058
Daphniphyllum oldhami	12062306	0.261957511	0.014662536
Elaeocarpus chinensis	12022747	1.924686299	0.127824984
Elaeocarpus chinensis	12074378	0.784850025	0.039139726
Elaeocarpus chinensis	12069270	1.782072233	0.125958531
Elaeocarpus chinensis	12022566	2.336599869	0.170148156
Elaeocarpus chinensis	12039760	4.344339597	0.126575564
Elaeocarpus chinensis	12001006	3.589861302	0.140465467
Litsea greenmaniana	12032894	0.236648333	0.010446793
Litsea greenmaniana	12053145	0.17564981	0.007175364
Litsea greenmaniana	12050261	2.461814319	0.106911662
Litsea greenmaniana	12068910	1.885691616	0.05452865
Litsea greenmaniana	12062198	4.160522385	0.10060942
Litsea greenmaniana	12050314	2.08405213	0.126513069
Schoepfia chinensis	12069674	3.381529019	0.298522949
Schoepfia chinensis	12024901	8.125147256	0.229331221
Schoepfia chinensis	12064740	4.925866971	0.330470566
Schoepfia chinensis	12026430	0.882865782	0.088896269
Schoepfia chinensis	12035421	5.903831908	0.328817826
Schoepfia chinensis	12021059	2.842851152	0.188148128
Machilus chinensis	12078595	0.207157614	0.017151087
Machilus chinensis	12038418	5.144043043	0.320546269
Machilus chinensis	12038418	6.119517507	0.482416783
Machilus chinensis	12038418	8.66892582	0.686059723
Machilus chinensis	12078595	4.23206145	0.264221453
Machilus chinensis	12078595	1.78787228	0.168119024
Cryptocarya concinna	12030024	5.033900553	0.274310146
Cryptocarya concinna	10018910	0.552446989	0.004725227
Cryptocarya concinna	12099282	1.101033867	0.049198261
Cryptocarya concinna	12052256	0.030469208	0.001986414
Cryptocarya concinna	12029459	2.647166023	0.229388065
Cryptocarya concinna	12079616	3.739545847	0.313693343
Ilex dasyphylla	12035972	2.464272157	0.096345461
Ilex dasyphylla	12035972	0.144903174	0.003115518
Ilex dasyphylla	12035972	2.628055183	0.105592717
Ilex dasyphylla	12037697	3.349918933	0.081216028
Ilex dasyphylla	12035972	0.8125914	0.027759219
Ilex dasyphylla	12037697	2.194233046	0.109500763
Symplocos laurina	12057469	0.069149917	0.004095074
Symplocos laurina	12037254	1.212505427	0.060100042
Symplocos laurina	12061800	0.772671897	0.027972584
Symplocos laurina	12025220	3.431365344	0.221459991
Symplocos laurina	12062066	0.315353508	0.010468343
Symplocos laurina	12058765	3.00849268	0.178210175
Engelhardtia roxburghiana	12030198	3.745817421	0.237446813
Engelhardtia roxburghiana	12030198	1.996536207	0.117936834
Engelhardtia roxburghiana	12030198	3.699117133	0.270774017
Engelhardtia roxburghiana	12030198	2.329640694	0.14686693
Engelhardtia roxburghiana	12030198	3.745817421	0.237446813
Engelhardtia roxburghiana	12030198	1.772270826	0.123157282
Cinnamomum porrectum	12078596	1.752849495	0.127801832
Cinnamomum porrectum	12054584	2.646920161	0.161842531
Cinnamomum porrectum	12059530	5.927426307	0.386093913
Cinnamomum porrectum	12030101	3.031469356	0.161931743
Cinnamomum porrectum	12053016	17.55911672	1.083359428
Cinnamomum porrectum	12029478	14.25776949	1.014241482
Xanthophyllum hainanense	12058361	0.364466546	0.008638045
Xanthophyllum hainanense	12032830	0.264052696	0.011469612
Xanthophyllum hainanense	12062763	4.795198049	0.088435875
Xanthophyllum hainanense	12063044	0.335591408	0.030752034
Xanthophyllum hainanense	12064925	1.758410255	0.079443029
Xanthophyllum hainanense	12064840	0.769679642	0.031758202
Gardenia jasminoides	12062022	2.016283798	0.070220203
Gardenia jasminoides	12024388	5.366076035	0.271899177
Gardenia jasminoides	12038009	1.692683014	0.110608126
Gardenia jasminoides	12058283	7.80583432	0.285162907
Gardenia jasminoides	12079244	1.762105325	0.067180764
Gardenia jasminoides	12028153	10.57392581	0.521027427
Litsea acutivena	12069358	2.166743013	0.217416262
Litsea acutivena	12036370	5.737260651	0.19264182
Litsea acutivena	12021771	2.152157658	0.101343999
Litsea acutivena	12055308	4.388724301	0.13220412
Litsea acutivena	12067305	2.269274261	0.107715681
Litsea acutivena	12029840	2.564500397	0.162780801
Mytilaria laosensis	12067999	3.681619551	0.292551765
Mytilaria laosensis	12067999	2.865304632	0.318329082
Mytilaria laosensis	12067999	4.454721776	0.396958831
Mytilaria laosensis	12067999	5.119637731	0.309670386
Mytilaria laosensis	12067999	1.260931089	0.095604178
Mytilaria laosensis	12067999	2.968827839	0.250063516
Corylopsis sinensis	12056184	4.542253029	0.296266245
Corylopsis sinensis	12059158	7.638741394	0.317839189
Corylopsis sinensis	12064722	2.72990371	0.139201378
Corylopsis sinensis	12067906	2.525099066	0.122875397
Corylopsis sinensis	12058792	2.725998666	0.138300688
Corylopsis sinensis	12068762	4.479282887	0.263287718
Symplocos stellaris	12025604	1.136464642	0.063184113
Symplocos stellaris	12037266	1.808950665	0.152219828
Symplocos stellaris	12037266	2.860066486	0.246762038
Symplocos stellaris	12025604	3.105502875	0.16338884
Symplocos stellaris	12037266	0.545860118	0.052368574
Symplocos stellaris	12062184	0.232316757	0.013627306
Castanopsis fissa	12077317	2.030227653	0.117186705
Castanopsis fissa	12077272	4.251421887	0.387870233
Castanopsis fissa	12076730	2.316033142	0.258711158
Castanopsis fissa	12072099	1.683848819	0.065513232
Castanopsis fissa	12077406	14.21214316	0.617811358
Castanopsis fissa	12077748	17.31621356	1.312322442
Reevesia thyrsoidess	12063633	0.25300788	0.013591396
Reevesia thyrsoidess	12058318	1.006003861	0.063071873
Reevesia thyrsoidess	12079213	6.050755367	0.328654758
Reevesia thyrsoidess	12058744	0.440674978	0.0287055
Reevesia thyrsoidess	12033036	2.583753486	0.077340496
Reevesia thyrsoidess	12025006	1.248012152	0.066822229
Pithecellobium lucidum	12072681	6.57407136	0.380872363
Pithecellobium lucidum	12057770	20.87321556	0.713217717
Pithecellobium lucidum	12072726	2.238670516	0.16435707
Pithecellobium lucidum	12077678	8.450767112	0.44093703
Pithecellobium lucidum	12059482	0.322522962	0.032886766
Pithecellobium lucidum	12063030	1.407945841	0.152402621
Maesa insignis	12029632	1.337051223	0.096445658
Maesa insignis	12029135	0.122710483	0.005288573
Maesa insignis	12030362	0.664348005	0.031256063
Maesa insignis	12029632	3.813414708	0.276612293
Maesa insignis	12032882	1.690242069	0.098912004
Maesa insignis	12030362	0.5330418	0.026418269
Castanopsis fabri	12077903	2.483038487	0.126294781
Castanopsis fabri	12078401	1.506983519	0.089039807
Castanopsis fabri	12076769	2.244963533	0.123522406
Castanopsis fabri	12076769	2.933937294	0.156899318
Castanopsis fabri	12069344	5.494338169	0.320859488
Castanopsis fabri	12055338	0.582189791	0.021655478
Diospyros morrisiana	12032834	2.594685205	0.308494904
Diospyros morrisiana	12061463	2.930625967	0.123423977
Diospyros morrisiana	12025260	0.368266646	0.018795512
Diospyros morrisiana	12033353	1.020552715	0.084663752
Diospyros morrisiana	12032145	9.284269683	0.490972576
Diospyros morrisiana	12072116	0.732848738	0.035773964
Ardisia quinquegona	12068704	4.26037743	0.271488884
Ardisia quinquegona	12032052	0.118007474	0.004190848
Ardisia quinquegona	12058217	0.995010625	0.072912054
Ardisia quinquegona	12001172	4.946512153	0.141641669
Ardisia quinquegona	12058305	0.585496426	0.034638068
Ardisia quinquegona	12035924	0.537645966	0.031945661
Cinnamomum appelianum	12061943	0.399370288	0.020886474
Cinnamomum appelianum	12077586	0.606953182	0.021003255
Cinnamomum appelianum	12077980	0.955546555	0.06642231
Cinnamomum appelianum	12075763	2.767492702	0.170349841
Cinnamomum appelianum	12077559	1.202630746	0.064185859
Cinnamomum appelianum	12077333	0.234122913	0.021127982
Glochidion eriocarpum	12035932	23.13009645	0.396546647
Glochidion eriocarpum	12035847	0.639784099	0.040014774
Glochidion eriocarpum	12035847	1.916384745	0.110265974
Glochidion eriocarpum	12075799	4.80878047	0.289026539
Glochidion eriocarpum	12035932	19.43538036	0.758619208
Glochidion eriocarpum	12075799	1.080135113	0.058678487
Diospyros strigosa	12021427	12.34598474	0.557842714
Diospyros strigosa	12022573	1.75867464	0.124027517
Diospyros strigosa	12076413	9.44441722	0.753124246
Diospyros strigosa	12078164	1.224897098	0.064050125
Diospyros strigosa	12078199	1.742420739	0.146022037
Diospyros strigosa	12035862	2.511857288	0.252058585
Manglietia moto	12067518	0.826198693	0.046143591
Manglietia moto	12072130	5.034850703	0.320286475
Manglietia moto	12067518	0.466075577	0.026407254
Manglietia moto	12072130	4.997600509	0.257263205
Manglietia moto	12022606	6.748380797	0.442501474
Manglietia moto	12022606	0.175544842	0.01221642
Ilex pubilimba	12038459	0.806311088	0.04774404
Ilex pubilimba	12050336	1.089274477	0.057298034
Ilex pubilimba	12029789	4.724351566	0.352937832
Ilex pubilimba	12058658	8.138066005	0.126247418
Ilex pubilimba	12078858	8.441133837	0.252575261
Ilex pubilimba	12050336	6.049035443	0.406067917
Casearia villilimba	12035636	0.735146913	0.04306039
Casearia villilimba	12068761	10.89336481	0.712460502
Casearia villilimba	12059438	2.703153587	0.141595091
Casearia villilimba	12063761	5.854386028	0.259509235
Casearia villilimba	12020066	0.049513534	0.001050856
Casearia villilimba	12070448	8.330977188	0.21090627
Hartia villosa	12065547	2.45870765	0.167470005
Hartia villosa	12059419	0.023061713	0.002200218
Hartia villosa	12030360	0.497918397	0.026654878
Hartia villosa	12077993	0.284319813	0.007633472
Hartia villosa	12058125	0.412707117	0.021063497
Hartia villosa	12053141	0.666676352	0.020697113
Castanopsis fordii	12076581	1.339380085	0.067693846
Castanopsis fordii	12079234	0.91159145	0.033139953
Castanopsis fordii	12078480	1.373874939	0.08032903
Castanopsis fordii	12078480	1.746097634	0.095501743
Castanopsis fordii	12076689	1.721249627	0.149428788
Castanopsis fordii	12076689	0.033799344	0.002904782
Ardisia elegans	12058342	0.008281144	0.000607903
Ardisia elegans	12029093	2.136919986	0.075933282
Ardisia elegans	12067418	3.04809131	0.169621242
Ardisia elegans	12070350	0.638264488	0.025526577
Ardisia elegans	12070357	0.003001839	8.91E-05
Ardisia elegans	12067367	2.992779095	0.165741726
Castanopsis carlesii	12055267	3.883975461	0.244251968
Castanopsis carlesii	12030314	1.601519188	0.114092987
Castanopsis carlesii	12033078	2.666606859	0.09346798
Castanopsis carlesii	12062285	2.737164685	0.139629294
Castanopsis carlesii	12067456	3.734213682	0.26106768
Castanopsis carlesii	12062065	0.346671644	0.015711878
symplocos congesta	12058825	2.891479311	0.166025836
symplocos congesta	12032847	1.100797341	0.063908913
symplocos congesta	12079962	2.049718201	0.061024636
symplocos congesta	12099300	4.862277129	0.322947581
symplocos congesta	12026507	2.883413863	0.145330389
symplocos congesta	12067935	2.201151657	0.217231799
Rapanea neriifolia	12063533	0.406587135	0.024134502
Rapanea neriifolia	12033293	5.713494676	0.275453438
Rapanea neriifolia	12062773	0.119577527	0.005426232
Rapanea neriifolia	12058949	5.097234492	0.298526464
Rapanea neriifolia	12032398	1.532486626	0.093270551
Rapanea neriifolia	12067537	2.237106874	0.115892337
Rehderodendron macrocarpum	12067464	13.31009686	0.751187393
Rehderodendron macrocarpum	12030233	0.423094347	0.04385054
Rehderodendron macrocarpum	12032139	2.907049128	0.109734822
Rehderodendron macrocarpum	12039719	2.022099734	0.097020914
Rehderodendron macrocarpum	12030181	1.442264	0.071435682
Rehderodendron macrocarpum	12069228	0.899614298	0.084242396
Schima superba	12058276	3.450727592	0.16823388
Schima superba	12026379	0.218951226	0.008861065
Schima superba	12057655	2.345106733	0.137240823
Schima superba	12058969	9.872485799	0.692745094
Schima superba	12058791	3.362377212	0.112064117
Schima superba	12075734	3.02657505	0.258366835
Machilus litseifolia	12024377	5.523326943	0.263457976
Machilus litseifolia	12024377	5.935256188	0.417978532
Machilus litseifolia	12024377	5.220729905	0.36282027
Machilus litseifolia	12024375	2.176335021	0.11798799
Machilus litseifolia	12024375	4.017175887	0.220625714
Machilus litseifolia	12024375	3.996601119	0.343921709
Manglietia fordiana	12065535	3.550578993	0.206953696
Manglietia fordiana	12066644	4.029322857	0.219979563
Manglietia fordiana	12058018	2.178633622	0.181545102
Manglietia fordiana	12069327	1.951067671	0.0876177
Manglietia fordiana	12035722	0.364718266	0.019976107
Manglietia fordiana	12063657	2.805148556	0.187136688
Ilex subficoidea	12035635	2.312682225	0.10392135
Ilex subficoidea	12066768	0.917736238	0.057013537
Ilex subficoidea	12072586	0.241068808	0.017192944
Ilex subficoidea	12077596	1.31017102	0.098547061
Ilex subficoidea	12062313	2.446694556	0.102442822
Ilex subficoidea	12020079	0.049586332	0.002646857
Ormosia pachycarpa	12062236	4.514802932	0.191010285
Ormosia pachycarpa	12024300	3.77150398	0.182412888
Ormosia pachycarpa	12099213	1.794010887	0.059005221
Ormosia pachycarpa	12072093	6.08529932	0.377685417
Ormosia pachycarpa	12077481	7.927219189	0.523808615
Ormosia pachycarpa	12033298	0.725861498	0.056222869
Machilus velutina	12029031	0.048072579	0.003495315
Machilus velutina	12052385	2.243258508	0.144730478
Machilus velutina	12026248	1.70390034	0.060788851
Machilus velutina	12064484	0.588131949	0.033931265
Machilus velutina	12026284	5.614267843	0.253746428
Machilus velutina	12035799	2.090405435	0.152960988
Turpinia arguta	12063727	4.803541988	0.278666464
Turpinia arguta	12056009	1.124375563	0.044918763
Turpinia arguta	12065908	4.364385911	0.378674989
Turpinia arguta	12076690	2.342212479	0.1500494
Turpinia arguta	12032354	12.33795471	0.604215184
Turpinia arguta	12078990	12.22386899	0.769128831
Evodia lepta	12066765	3.706440609	0.219239767
Evodia lepta	12076728	3.222707874	0.212742762
Evodia lepta	12062124	6.303718647	0.291128349
Evodia lepta	12067519	3.587774481	0.250825917
Evodia lepta	12021188	9.75766922	0.404329814
Evodia lepta	12038410	27.28720873	0.813381115
Ilex triflora	12069509	1.064623869	0.061236425
Ilex triflora	12072772	0.866915551	0.057344161
Ilex triflora	12020349	0.674585732	0.035892873
Ilex triflora	12020300	1.407633377	0.086838642
Ilex triflora	12037018	3.648246231	0.164508632
Ilex triflora	12036342	4.511207077	0.144919518
Lindera metcalfiana	12030397	2.162998663	0.138268337
Lindera metcalfiana	12030397	0.614677033	0.039204007
Lindera metcalfiana	12030397	0.400852624	0.024357679
Lindera metcalfiana	12030397	0.605285109	0.033246607
Lindera metcalfiana	12030397	1.515806895	0.085838503
Lindera metcalfiana	12030397	1.818801182	0.122123254
Fortunella hindsii	12037693	4.001584345	0.229803161
Fortunella hindsii	12032299	1.017142578	0.066740521
Fortunella hindsii	12032299	3.113957456	0.200267313
Fortunella hindsii	12037693	3.93712596	0.229496649
Fortunella hindsii	12037693	4.742958144	0.285613434
Fortunella hindsii	12032299	5.72383036	0.446104463
Vitex quinata	12055307	2.273382434	0.127095717
Vitex quinata	12067220	1.242882232	0.081269393
Vitex quinata	12076369	1.464418992	0.05776436
Vitex quinata	12027006	3.326094229	0.26277394
Vitex quinata	12060285	0.670005392	0.045616764
Vitex quinata	12070353	0.220462621	0.007822022
Engelhardtia fenzlii	12067261	2.434484881	0.125261289
Engelhardtia fenzlii	12072410	4.050809161	0.70062392
Engelhardtia fenzlii	12070809	10.97039017	0.714767967
Engelhardtia fenzlii	12038439	0.8515286	0.045168006
Engelhardtia fenzlii	12070447	0.043295598	0.002274456
Engelhardtia fenzlii	12070873	0.259084216	0.0153774
Tutcheria championi	12068760	3.230832779	0.152848668
Tutcheria championi	12070659	0.477760256	0.012021344
Tutcheria championi	12062793	3.858890008	0.177842866
Tutcheria championi	12064451	8.334844938	0.319885596
Tutcheria championi	12079972	4.679816685	0.113131164
Tutcheria championi	12079218	0.13882599	0.006903342
Euonymus laxiflorus	12001197	3.112920763	0.156876359
Euonymus laxiflorus	12024161	0.862028637	0.042338169
Euonymus laxiflorus	12070855	1.94408391	0.144669092
Euonymus laxiflorus	12033328	0.445976028	0.032401578
Euonymus laxiflorus	12072974	1.271844632	0.082771452
Euonymus laxiflorus	12079933	1.328300989	0.056818235
Itea chinensis	12039789	0.02225856	0.001434511
Itea chinensis	12029629	1.055338625	0.073644768
Itea chinensis	12069076	0.424575921	0.026585821
Itea chinensis	12027917	7.539867333	0.254709809
Itea chinensis	12060256	1.014873356	0.058400769
Itea chinensis	12069023	0.594475788	0.040045626
Saurauia tristyla	12001090	1.025928098	0.047515313
Saurauia tristyla	12079965	4.464246731	0.277629198
Saurauia tristyla	12056360	3.72833318	0.271749943
Saurauia tristyla	12079965	1.444703375	0.079151572
Saurauia tristyla	12001090	0.072582322	0.004464369
Saurauia tristyla	12056360	1.643864788	0.091929012
Adina pilulifera	12078718	1.772468329	0.116671624
Adina pilulifera	12070289	3.433251991	0.120311398
Adina pilulifera	12004737	0.335331446	0.016955394
Adina pilulifera	12078718	1.774424893	0.179555863
Adina pilulifera	12065829	3.164711035	0.222964401
Adina pilulifera	12070289	7.618570557	0.450172714
Microtropis gracilipes	12099585	3.032453385	0.202308969
Microtropis gracilipes	12068827	1.016871579	0.039695299
Microtropis gracilipes	12033306	0.60798151	0.041415905
Microtropis gracilipes	12063025	0.234003365	0.018099594
Microtropis gracilipes	12020328	3.138033539	0.202582107
Microtropis gracilipes	12057604	2.275901043	0.146674721
Photinia prunifolia	12072708	5.625134536	0.412641604
Photinia prunifolia	12061863	0.648669172	0.021639775
Photinia prunifolia	12059525	0.588819768	0.03297497
Photinia prunifolia	12024076	2.482592904	0.149839038
Photinia prunifolia	12078675	2.146819134	0.139565306
Photinia prunifolia	12061864	3.820150903	0.106836595
Homalium cochinchinense	12029790	7.545624362	0.320315161
Homalium cochinchinense	12061958	2.064199459	0.04930099
Homalium cochinchinense	12079936	4.832867219	0.241361376
Homalium cochinchinense	12062009	16.00387634	0.971804332
Homalium cochinchinense	12076705	2.90575305	0.135277605
Homalium cochinchinense	12061873	0.719657666	0.029118698
Ficus erecta Thunb. Var. beecheyana	12067957	1.783034003	0.072690702
Ficus erecta Thunb. Var. beecheyana	12067957	2.410753778	0.145855191
Ficus erecta Thunb. Var. beecheyana	12067957	7.966698583	0.174015416
Ficus erecta Thunb. Var. beecheyana	12067957	1.766764137	0.127776834
Ficus erecta Thunb. Var. beecheyana	12067957	5.464987324	0.181026742
Ficus erecta Thunb. Var. beecheyana	12067957	7.24515167	0.31707752
Lithocarpus litseifolius	12063465	4.428227735	0.563906078
Lithocarpus litseifolius	12039505	2.948726547	0.181606476
Lithocarpus litseifolius	12032144	4.183275178	0.246966253
Lithocarpus litseifolius	12031051	7.568851095	0.335761098
Lithocarpus litseifolius	12072457	0.269301358	0.03072202
Lithocarpus litseifolius	12079555	5.965626741	0.254049553
Ilex rotunda	12004774	2.816055353	0.20312388
Ilex rotunda	12004774	3.777358981	0.192695255
Ilex rotunda	12072095	6.268128512	0.328001485
Ilex rotunda	12072095	12.41988851	0.684777477
Ilex rotunda	12004774	5.461828664	0.148514233
Ilex rotunda	12072095	1.479219861	0.064507774
Sinosideroxylon wightianum	12064218	1.490550665	0.116113692
Sinosideroxylon wightianum	12064641	0.450177719	0.050702578
Sinosideroxylon wightianum	12077887	1.079576704	0.086422288
Sinosideroxylon wightianum	12069686	3.452074819	0.281832565
Sinosideroxylon wightianum	12029774	0.333892514	0.068535909
Sinosideroxylon wightianum	12029774	1.441806645	0.166818484
Eurya hebeclados	12036867	0.531814588	0.033954117
Eurya hebeclados	12056192	0.630695093	0.031471082
Eurya hebeclados	12025104	0.427661545	0.035881121
Eurya hebeclados	12033308	2.902627834	0.188072292
Eurya hebeclados	12068889	5.832964527	0.273559115
Eurya hebeclados	12058804	1.014304422	0.095953326
Camellia caudata	12062710	0.292301207	0.022125465
Camellia caudata	12038125	0.924401302	0.031575326
Camellia caudata	12079910	0.098509687	0.004018592
Camellia caudata	12056318	0.805729297	0.03706766
Camellia caudata	12055397	0.928025982	0.04923396
Camellia caudata	12099217	0.444017305	0.020291369
Distylium racemosum	12056266	0.477132904	0.024109695
Distylium racemosum	12060343	2.103142375	0.146863332
Distylium racemosum	12059194	5.913697199	0.189303588
Distylium racemosum	12063563	2.115974105	0.156126094
Distylium racemosum	12056323	1.742709288	0.080820531
Distylium racemosum	12064933	1.607824047	0.215063152
Pentaphylax euryoides	12058123	0.41049456	0.020761351
Pentaphylax euryoides	12058123	2.250637989	0.155911724
Pentaphylax euryoides	12037042	0.688976245	0.064654495
Pentaphylax euryoides	12037042	2.355809083	0.14196652
Pentaphylax euryoides	12037042	1.915232255	0.353112178
Pentaphylax euryoides	12058123	0.264321322	0.013608913
Eurya nitida	12077348	3.315312978	0.213623337
Eurya nitida	12062177	6.826271456	0.062459395
Eurya nitida	12057693	3.578436828	0.22222856
Eurya nitida	12062177	1.828326466	0.122233062
Eurya nitida	12058049	1.914860648	0.084713885
Eurya nitida	12058049	2.18607418	0.118839291
Wikstroemia nutans	12060837	0.248510586	0.013122959
Wikstroemia nutans	12079741	0.397846868	0.027482553
Wikstroemia nutans	12068808	0.700241016	0.060278341
Wikstroemia nutans	12064738	0.099599974	0.01157661
Wikstroemia nutans	12022411	1.630497774	0.042745326
Wikstroemia nutans	12053147	2.937671793	0.236713332
Neolitsea phanerophlebia	12078021	1.58950774	0.08188313
Neolitsea phanerophlebia	12054586	3.036353874	0.126737573
Neolitsea phanerophlebia	12056261	1.283260791	0.057222646
Neolitsea phanerophlebia	12036397	1.36291925	0.079045839
Neolitsea phanerophlebia	12029520	1.233637637	0.051814857
Neolitsea phanerophlebia	12055222	3.24565818	0.172682653
Symplocos adenophylla	12079183	0.991705417	0.068850956
Symplocos adenophylla	12068689	1.842008278	0.099445251
Symplocos adenophylla	12037789	1.370470089	0.023375417
Symplocos adenophylla	12070240	0.530021009	0.02954313
Symplocos adenophylla	12072087	4.064393981	0.283161205
Symplocos adenophylla	12072900	4.029593886	0.315856728
Laurocerasus phaeosticta	12077409	1.40750265	0.058928269
Laurocerasus phaeosticta	12063048	0.103430726	0.011914318
Laurocerasus phaeosticta	12054303	0.205433951	0.01872042
Laurocerasus phaeosticta	12079406	1.909889539	0.12536772
Laurocerasus phaeosticta	12062696	0.862268466	0.045736835
Laurocerasus phaeosticta	12052217	0.412381021	0.041797598
Dendrobenthamia hongkongensis	12078860	14.66528192	1.379366677
Dendrobenthamia hongkongensis	12072141	5.141699218	0.270043827
Dendrobenthamia hongkongensis	12077693	7.139725952	0.677715105
Dendrobenthamia hongkongensis	12072132	0.470367701	0.025358845
Dendrobenthamia hongkongensis	12078940	8.977353312	0.54041829
Dendrobenthamia hongkongensis	12072141	9.906861678	0.631952472
Eriobotrya fragrans	12057700	1.133570497	0.052909777
Eriobotrya fragrans	12062047	1.824512266	0.090775118
Eriobotrya fragrans	12069067	8.675430611	0.670261638
Eriobotrya fragrans	12001146	0.860926847	0.061727492
Eriobotrya fragrans	12024700	4.691572797	0.302349232
Eriobotrya fragrans	12068802	6.089552823	0.385829894
Antidesma venosum	12035859	0.084081147	0.00642468
Antidesma venosum	12021551	2.218389516	0.183640388
Antidesma venosum	12038011	2.262000209	0.153366363
Antidesma venosum	12064428	8.926885956	0.573795783
Antidesma venosum	12065894	0.794036424	0.059967406
Antidesma venosum	12078015	13.20940145	0.760506228
Artocarpus styracifolius	12067330	3.241762444	0.236314614
Artocarpus styracifolius	12061447	5.657520717	0.17922548
Artocarpus styracifolius	12059628	3.992736564	0.281338067
Artocarpus styracifolius	12060114	0.409852961	0.017433886
Artocarpus styracifolius	12067912	4.584060291	0.206766319
Artocarpus styracifolius	12021056	1.672964887	0.129468509
Lithocarpus calophyllus	12099481	0.984785101	0.045823595
Lithocarpus calophyllus	12062104	2.728047374	0.123229365
Lithocarpus calophyllus	12032132	3.395976907	0.154171172
Lithocarpus calophyllus	12068915	3.783852589	0.243577394
Lithocarpus calophyllus	12030318	0.414099757	0.028771476
Lithocarpus calophyllus	12029548	4.567593053	0.323499713
Neolitsea aurata	12058075	15.66723368	1.293805639
Neolitsea aurata	12058076	5.918174919	0.555239371
Neolitsea aurata	12056237	11.15321767	0.073718802
Neolitsea aurata	12058073	0.190385911	0.015356424
Neolitsea aurata	12058073	0.895323952	0.090778545
Neolitsea aurata	12052202	14.67107813	1.475231893
Schefflera octophylla	12050372	0.276157187	0.014819734
Schefflera octophylla	12059623	0.927629466	0.11567579
Schefflera octophylla	12077381	3.130780294	0.222884661
Schefflera octophylla	12057004	5.952512501	0.273897016
Schefflera octophylla	12079182	0.469435975	0.03559162
Schefflera octophylla	12075747	2.412375237	0.355429439
Myrica rubra	12074270	2.670973105	0.203897773
Myrica rubra	12074270	3.414975857	0.235671475
Myrica rubra	12022405	4.548384174	0.375342633
Myrica rubra	12035529	2.833087166	0.136299244
Myrica rubra	12025410	2.198369673	0.11712251
Myrica rubra	12057464	1.296975154	0.079645481
Olea dioica	12031011	1.430461284	0.074244257
Olea dioica	12021102	1.616415154	0.04839791
Olea dioica	12057026	2.498939875	0.141963885
Olea dioica	12033021	3.107623839	0.199993965
Olea dioica	12036829	3.489882374	0.211104199
Olea dioica	12070510	0.258132959	0.01171152
Cinnamomum burmanni	12061484	0.502337745	0.027988826
Cinnamomum burmanni	12036875	1.728441105	0.107861707
Cinnamomum burmanni	12061075	3.408686429	0.229673626
Cinnamomum burmanni	12072659	5.504196685	0.354007998
Cinnamomum burmanni	12056537	14.90671587	0.891321384
Cinnamomum burmanni	12035688	0.595882392	0.044387648
Rhododendron simsii	12064294	3.017222144	0.210108498
Rhododendron simsii	12069155	3.631679365	0.146139814
Rhododendron simsii	12020074	4.235225738	0.358722131
Rhododendron simsii	12056304	4.624176734	0.130605595
Rhododendron simsii	12028067	9.566050422	0.187341784
Rhododendron simsii	12068712	1.332862377	0.082506815
Lithocarpus lohangwu	12024914	0.359666173	0.019082136
Lithocarpus lohangwu	12032152	0.795024479	0.036603627
Lithocarpus lohangwu	12026506	2.391817092	0.164927917
Lithocarpus lohangwu	12020113	5.135469624	0.284796041
Lithocarpus lohangwu	12026322	1.308410815	0.073653428
Lithocarpus lohangwu	12068661	0.543746413	0.056355027
Meliosma rigida Sieb. et Zucc. var. pannosa	12060817	13.22419583	0.918426989
Meliosma rigida Sieb. et Zucc. var. pannosa	12060817	13.32551818	0.695913779
Meliosma rigida Sieb. et Zucc. var. pannosa	12060817	13.7330105	0.66131938
Meliosma rigida Sieb. et Zucc. var. pannosa	12060817	13.81041317	0.953252311
Meliosma rigida Sieb. et Zucc. var. pannosa	12060817	16.4797223	0.808756238
Meliosma rigida Sieb. et Zucc. var. pannosa	12060817	19.35287072	0.979829009
Ixonanthes chinensis	12062188	0.253358711	0.012772993
Ixonanthes chinensis	12059454	12.93581385	0.693357558
Ixonanthes chinensis	12032163	13.10428463	0.50070565
Ixonanthes chinensis	12031376	14.76576562	0.279043592
Ixonanthes chinensis	12028983	0.662028392	0.049340375
Ixonanthes chinensis	12028983	0.482612993	0.02277183
Meliosma squamulata	12027953	2.572618913	0.133236422
Meliosma squamulata	12057407	4.78489609	0.210209146
Meliosma squamulata	12023057	0.131994616	0.009484411
Meliosma squamulata	12062774	0.294433349	0.021618499
Meliosma squamulata	12021022	0.484017233	0.052195888
Meliosma squamulata	12063546	2.91351376	0.219287073
Litsea elongata	12023026	0.569368092	0.031907109
Litsea elongata	12063695	1.040927654	0.053362682
Litsea elongata	12030311	4.438143575	0.340873656
Litsea elongata	12058748	6.740111402	0.279514672
Litsea elongata	12070794	6.99759427	0.290340376
Litsea elongata	12099359	9.861516663	0.496946805
Carallia brachiata	12079946	1.515882035	0.099388169
Carallia brachiata	12077344	1.870855775	0.066468526
Carallia brachiata	12079947	4.935541401	0.216896221
Carallia brachiata	12028171	4.964365618	0.244679991
Carallia brachiata	12078972	0.8185746	0.067312464
Carallia brachiata	12027823	0.962106515	0.050610288
Cyclobalanopsis bambusaefolia	12052387	1.927549525	0.208389603
Cyclobalanopsis bambusaefolia	12021761	2.358581902	0.155404179
Cyclobalanopsis bambusaefolia	12061974	3.992659794	0.124042805
Cyclobalanopsis bambusaefolia	12068832	4.765097889	0.214635885
Cyclobalanopsis bambusaefolia	12037220	3.743561662	0.289971988
Cyclobalanopsis bambusaefolia	12026789	0.503551338	0.048078998
Syzygium championii	12024063	0.20457352	0.008098619
Syzygium championii	12024397	1.942470459	0.071540512
Syzygium championii	12027961	6.123009	0.468147896
Syzygium championii	12056327	6.362089001	0.634827985
Syzygium championii	12052237	0.277062491	0.032715605
Syzygium championii	12021418	0.269678427	0.01400003
Lithocarpus uvariifolius	12072816	0.672002608	0.029357131
Lithocarpus uvariifolius	12029795	2.610541499	0.154382051
Lithocarpus uvariifolius	12020388	0.482014612	0.035575422
Lithocarpus uvariifolius	12056293	0.87522979	0.033479711
Lithocarpus uvariifolius	12035692	1.322174145	0.065324277
Lithocarpus uvariifolius	12027166	6.441824262	0.122397977
